# Supplementary material for: High-throughput sequencing and morphology perform equally well for benthic monitoring of marine ecosystems
Source: PubMed Central journal article supplement (PMC4564730; doi:10.1038/srep13932), 2015-09-10
Supplement: srep13932-s1.pdf [file srep13932-s1.pdf]

## **Supplementary Information:**

### **High-throughput sequencing and morphology perform equally well for benthic monitoring of marine ecosystems**

Franck Lejzerowicz<sup>1</sup>, Philippe Esling<sup>1,2</sup>, Loïc Pillet<sup>1,3</sup>, Thomas A. Wilding<sup>4</sup>,  
Kenneth D. Black<sup>4</sup>, Jan Pawlowski<sup>1</sup>

<sup>1</sup> Department of Genetics and Evolution, University of Geneva, Switzerland

<sup>2</sup> IRCAM, UMR 9912, Université Pierre et Marie Curie, Paris, France

<sup>3</sup> ADMM UMR 7144, CNRS, Station Biologique de Roscoff, 29682 Roscoff, France

<sup>4</sup> SAMS, Scottish Marine Institute, Oban, Argyll, UK

\* To whom correspondence should be addressed. Tel: +41223793077; Fax:  
+41223793340; Email: franck.lejzerowicz@unige.ch

Present Address: [Franck Lejzerowicz], Department of Genetics and Evolution,  
University of Geneva, Sciences 3, 30, Quai Ernest Ansermet, CH-1211 Geneva 4,  
Switzerland

Short title: High-throughput sequencing for benthic monitoring

Supplementary Figure 1. Sequence reads filtering. The log<sub>10</sub>-transformed numbers of DNA (upper panel) and RNA (lower panel) sequence reads are shown after sequencing (raw), after the quality-filtering<sup>23</sup> and de-multiplexing<sup>29</sup> as (filt) and after selection of Metazoan sequences (meta). Each boxplot represents a maximum of 5 samples for each of the 10 stations

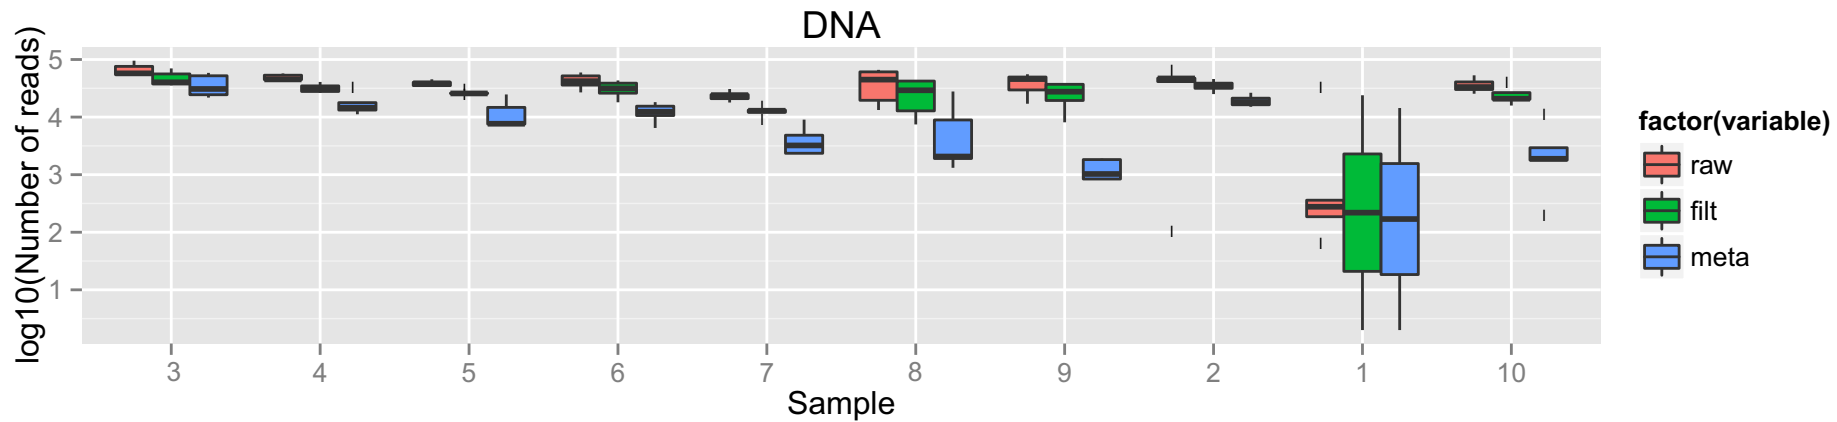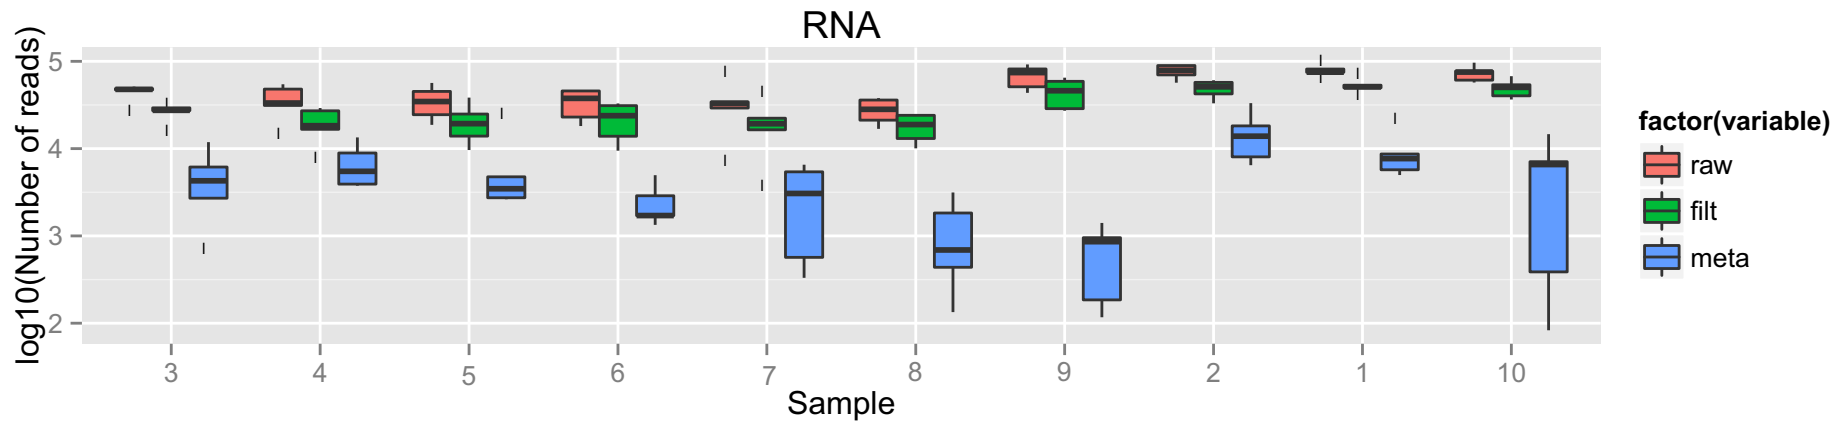

Supplementary Figure 2: Comparison of the diversity detected by the molecular and morphotaxonomic approaches at each assigned taxonomic level. The taxa to which the OTUs/species could be assigned are either found in both the molecular and morphological dataset (“Both”), in the molecular dataset only (“Molecular”) or in the morphological dataset only (“Morphological”). For each of these fractions, a pie chart represents the proportions of taxa in terms of OTU (for the molecular approach) or species (for the morphotaxonomic approach). For the “Both” fraction, the outer chart represents the molecular data and the inner chart represents the morphotaxonomic data. The numbers inside the circles correspond to the numbers of assigned OTU/species while the numbers outside the circles indicate the number of taxa that could have been assigned the taxonomic level under consideration.

# Molecular

# Both

# Morphology

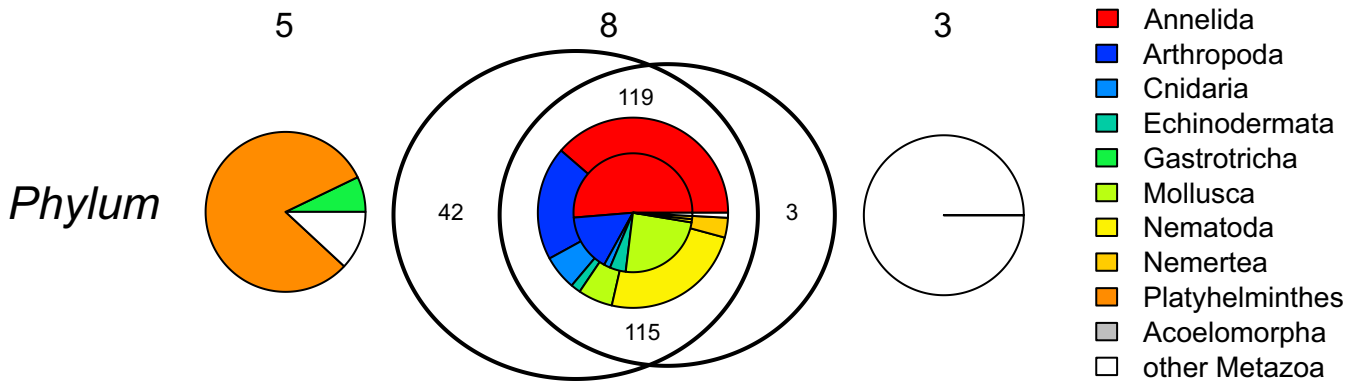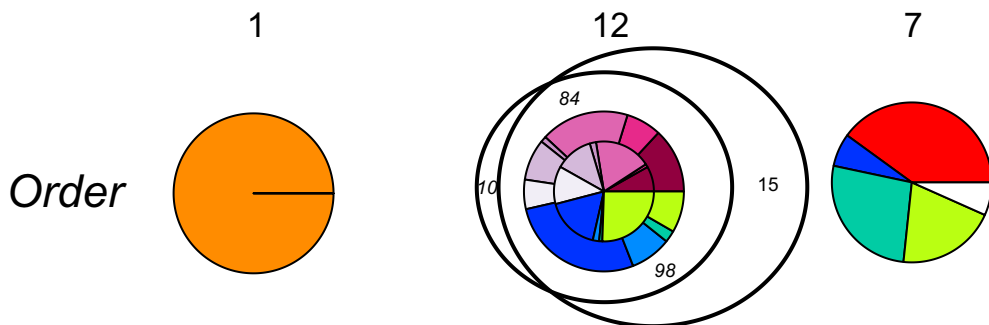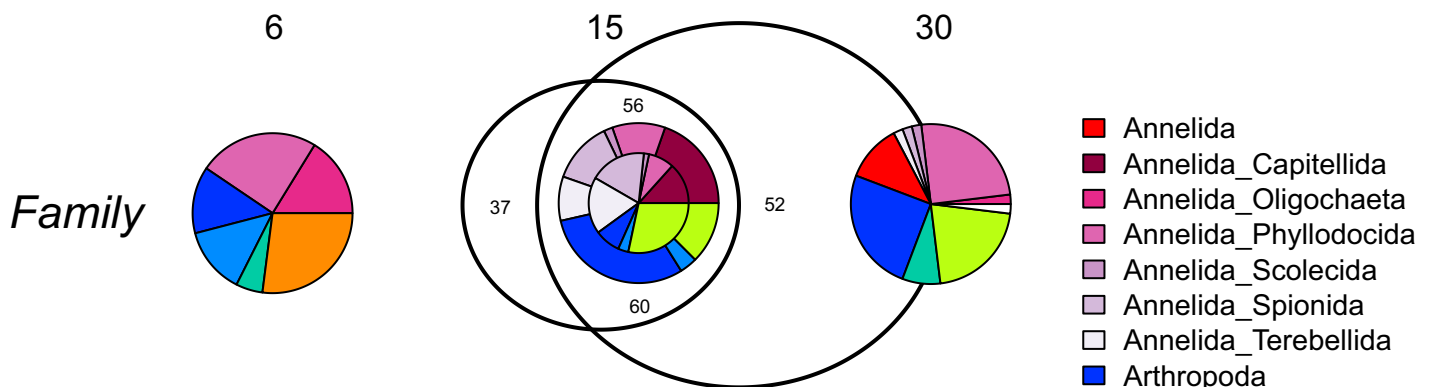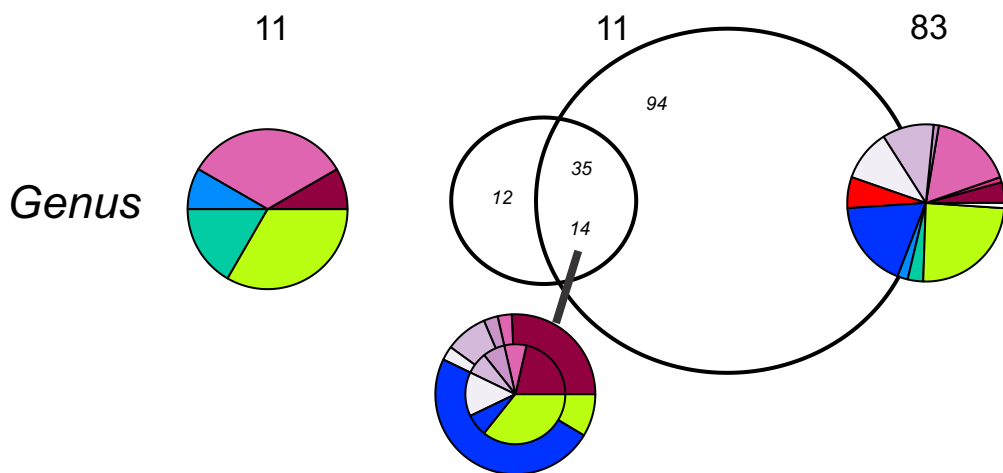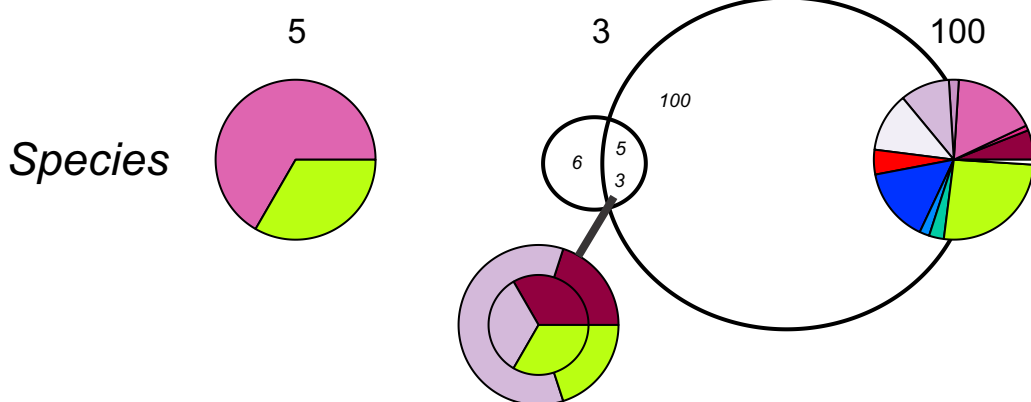

Supplementary Figure 3: Non-metric multidimensional scaling plots. The plots are presented with all the biological replicate samples (a, d), only the DNA replicates of the impacted stations (b, e) or only the RNA replicates of the impacted stations (c, f). All sample distances are computed using the Jaccard dissimilarity index and based either on OTU presence/absence data (upper panels) or normalized OTU sequence abundance data (lower panels).

All samples

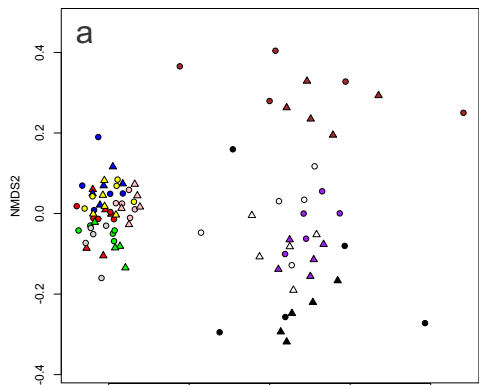

DNA impacted samples

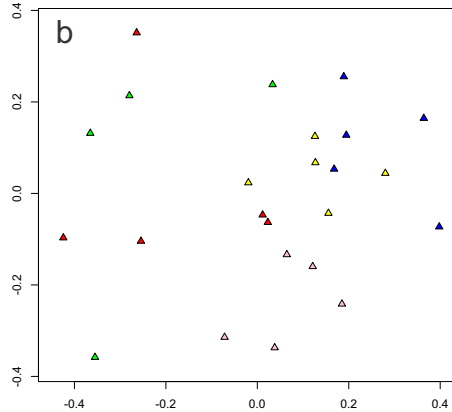

RNA impacted samples

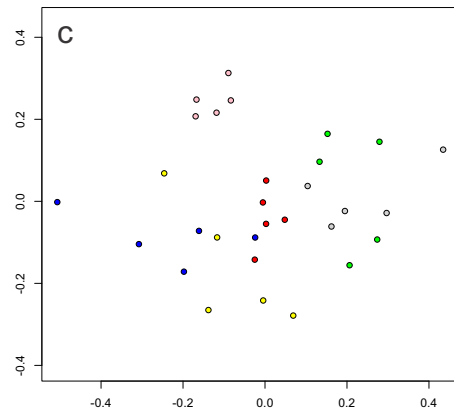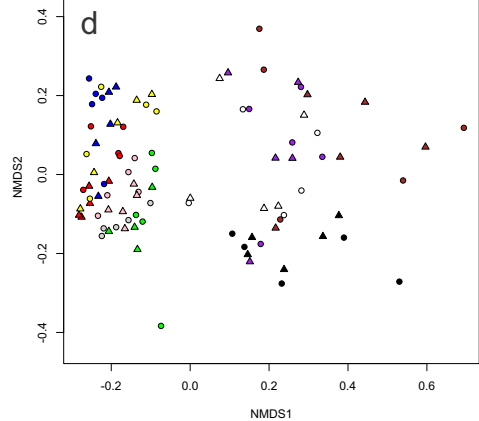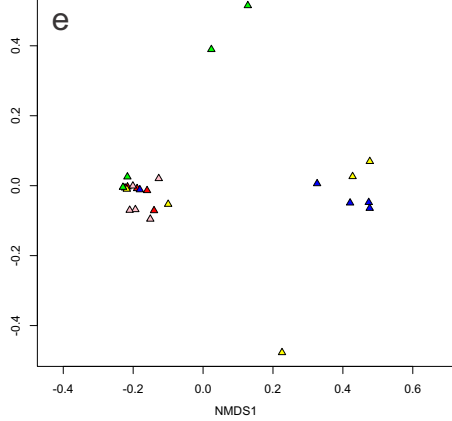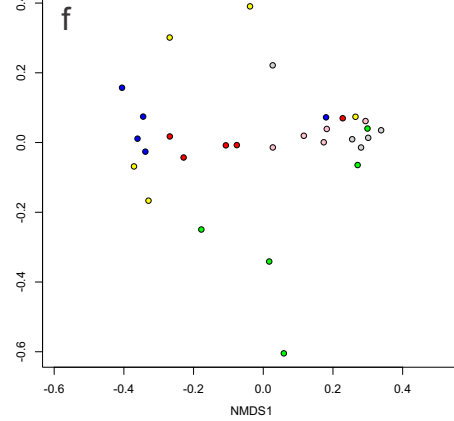

Presence / absence

Sequence abundance

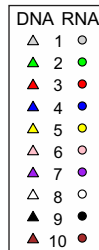

Supplementary Figure 4: Proportions of taxa associated with the different ecological groups used for the computation of the biotic indices. The taxa assigned using HTS (“Molecular”, left chart) and assigned in the morphotaxonomic inventory (“Morphology”, right chart) are associated with the total number of species (below numbers).



# Molecular

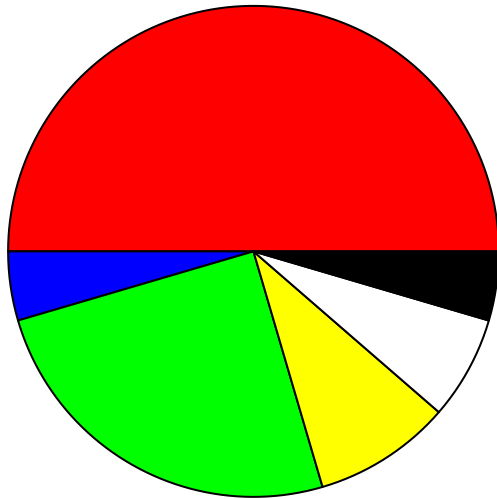

44

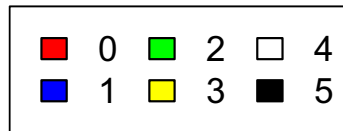

# Morphological

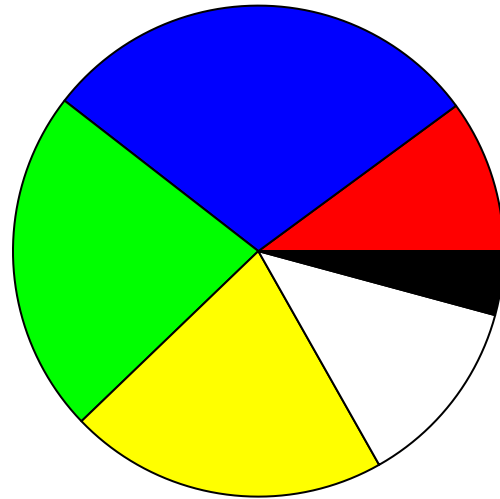

119

**Supplementary Table 1.** Sampling sites and metadata

| Station | Date    | LatDeg | LatMin | LonDeg | LonMin | Depth | Redox | Distance (m) |
|---------|---------|--------|--------|--------|--------|-------|-------|--------------|
| 1       | 5/25/13 | 56     | 30.095 | 5      | 30.008 | 29.1  | 83    | 0            |
| 2       | 5/25/13 | 56     | 30.091 | 5      | 30.016 | 27.9  | 153   | 11           |
| 3       | 5/25/13 | 56     | 30.088 | 5      | 30.03  | 26.7  | 183   | 26           |
| 4       | 5/25/13 | 56     | 30.082 | 5      | 30.036 | 26.9  | 44    | 40           |
| 5       | 5/25/13 | 56     | 30.079 | 5      | 30.037 | 26.5  | -2    | 50           |
| 6       | 5/25/13 | 56     | 30.077 | 5      | 30.055 | 26.1  | -5    | 60           |
| 7       | 5/25/13 | 56     | 29.982 | 5      | 30.171 | 27    | 92    | 270          |
| 8       | 5/25/13 | 56     | 29.95  | 5      | 30.206 | 28.9  | 69    | 340          |
| 9       | 5/25/13 | 56     | 29.992 | 5      | 30.236 | 29.2  | 107   | 400          |
| 10      | 5/25/13 | 56     | 30.06  | 5      | 29.969 | 33.4  | 87    | 76           |

**Supplementary Table 2.** Tag-to-sample information and tagged primer sequences.

| Molecule | Sample | Replicate | Forward | Reverse | Molecule | Sample | Replicate | Forward | Reverse |
|----------|--------|-----------|---------|---------|----------|--------|-----------|---------|---------|
| RNA      | 1      | 1         | V4F-K   | V4R-H   | DNA      | 1      | 1         | V4F-X   | V4R-O   |
|          |        | 2         | V4F-K   | V4R-T   |          |        | 2         | V4F-X   | V4R-U   |
|          |        | 3         | V4F-K   | V4R-X   |          |        | 3         | V4F-Y   | V4R-H   |
|          |        | 4         | V4F-L   | V4R-A   |          |        | 4         | V4F-Y   | V4R-L   |
|          |        | 5         | V4F-L   | V4R-E   |          |        | 5         | V4F-Y   | V4R-N   |
|          | 2      | 1         | V4F-I   | V4R-V   |          | 2      | 1         | V4F-W   | V4R-J   |
|          |        | 2         | V4F-J   | V4R-A   |          |        | 2         | V4F-W   | V4R-N   |
|          |        | 3         | V4F-J   | V4R-H   |          |        | 3         | V4F-W   | V4R-U   |
|          |        | 4         | V4F-J   | V4R-W   |          |        | 4         | V4F-X   | V4R-G   |
|          |        | 5         | V4F-K   | V4R-B   |          |        | 5         | V4F-X   | V4R-K   |
|          | 3      | 1         | V4F-A   | V4R-J   |          | 3      | 1         | V4F-N   | V4R-A   |
|          |        | 2         | V4F-A   | V4R-L   |          |        | 2         | V4F-N   | V4R-F   |
|          |        | 3         | V4F-A   | V4R-N   |          |        | 3         | V4F-N   | V4R-W   |
|          |        | 4         | V4F-A   | V4R-S   |          |        | 4         | V4F-N   | V4R-Y   |
|          |        | 5         | V4F-B   | V4R-G   |          |        | 5         | V4F-O   | V4R-A   |
|          | 4      | 1         | V4F-B   | V4R-K   |          | 4      | 1         | V4F-O   | V4R-B   |
|          |        | 2         | V4F-B   | V4R-N   |          |        | 2         | V4F-O   | V4R-T   |
|          |        | 3         | V4F-B   | V4R-O   |          |        | 3         | V4F-O   | V4R-X   |
|          |        | 4         | V4F-C   | V4R-B   |          |        | 4         | V4F-P   | V4R-C   |
|          |        | 5         | V4F-C   | V4R-G   |          |        | 5         | V4F-P   | V4R-I   |
|          | 5      | 1         | V4F-C   | V4R-P   |          | 5      | 1         | V4F-P   | V4R-T   |
|          |        | 2         | V4F-C   | V4R-V   |          |        | 2         | V4F-Q   | V4R-D   |
|          |        | 3         | V4F-D   | V4R-I   |          |        | 3         | V4F-Q   | V4R-V   |
|          |        | 4         | V4F-D   | V4R-M   |          |        | 4         | V4F-Q   | V4R-Z   |
| 5        |        | V4F-D     | V4R-Q   | 5       | V4F-R    |        | V4R-B     |         |         |
| 6        | 1      | V4F-D     | V4R-W   | 6       | 1        | V4F-R  | V4R-E     |         |         |
|          | 2      | V4F-E     | V4R-I   |         | 2        | V4F-R  | V4R-V     |         |         |
|          | 3      | V4F-E     | V4R-L   |         | 3        | V4F-R  | V4R-Y     |         |         |
|          | 4      | V4F-E     | V4R-O   |         | 4        | V4F-S  | V4R-F     |         |         |

|    |  |   |       |       |    |  |   |       |       |
|----|--|---|-------|-------|----|--|---|-------|-------|
|    |  | 5 | V4F-E | V4R-R |    |  | 5 | V4F-S | V4R-M |
| 7  |  | 1 | V4F-F | V4R-C | 7  |  | 1 | V4F-S | V4R-P |
|    |  | 2 | V4F-F | V4R-D |    |  | 2 | V4F-S | V4R-Q |
|    |  | 3 | V4F-F | V4R-S |    |  | 3 | V4F-T | V4R-G |
|    |  | 4 | V4F-F | V4R-Z |    |  | 4 | V4F-T | V4R-K |
|    |  | 5 | V4F-G | V4R-F |    |  | 5 | V4F-T | V4R-S |
| 8  |  | 1 | V4F-G | V4R-M | 8  |  | 1 | V4F-T | V4R-Z |
|    |  | 2 | V4F-G | V4R-T |    |  | 2 | V4F-U | V4R-H |
|    |  | 3 | V4F-G | V4R-X |    |  | 3 | V4F-U | V4R-L |
|    |  | 4 | V4F-H | V4R-J |    |  | 4 | V4F-U | V4R-W |
|    |  | 5 | V4F-H | V4R-K |    |  | 5 | V4F-U | V4R-X |
| 9  |  | 1 | V4F-H | V4R-U | 9  |  | 1 | V4F-V | V4R-C |
|    |  | 2 | V4F-H | V4R-Y |    |  | 2 | V4F-V | V4R-I |
|    |  | 3 | V4F-I | V4R-D |    |  | 3 | V4F-V | V4R-Q |
|    |  | 4 | V4F-I | V4R-E |    |  | 4 | V4F-V | V4R-R |
|    |  | 5 | V4F-I | V4R-P |    |  | 5 | V4F-W | V4R-D |
| 10 |  | 1 | V4F-L | V4R-U | 10 |  | 1 | V4F-Y | V4R-R |
|    |  | 2 | V4F-L | V4R-Y |    |  | 2 | V4F-Z | V4R-E |
|    |  | 3 | V4F-M | V4R-C |    |  | 3 | V4F-Z | V4R-M |
|    |  | 4 | V4F-M | V4R-F |    |  | 4 | V4F-Z | V4R-P |
|    |  | 5 | V4F-M | V4R-Z |    |  | 5 | V4F-Z | V4R-S |

---

Forward primer sequences (5'-3')

---

|       |                              |
|-------|------------------------------|
| V4F-A | ACACACACCCAGCASCYGCGGTAATTCC |
| V4F-B | ACGACTCTCCAGCASCYGCGGTAATTCC |
| V4F-C | ACGCTAGTCCAGCASCYGCGGTAATTCC |
| V4F-D | ACTATCATCCAGCASCYGCGGTAATTCC |
| V4F-E | ACTGCTGACCAGCASCYGCGGTAATTCC |
| V4F-F | AGACATCTCCAGCASCYGCGGTAATTCC |
| V4F-G | AGTCTACACCAGCASCYGCGGTAATTCC |
| V4F-H | CAGATCACCCAGCASCYGCGGTAATTCC |
| V4F-I | CATACTGCCAGCASCYGCGGTAATTCC  |
| V4F-J | CATATACTCCAGCASCYGCGGTAATTCC |
| V4F-K | CATCATATCCAGCASCYGCGGTAATTCC |
| V4F-L | CGACTCATCCAGCASCYGCGGTAATTCC |
| V4F-M | CGAGACGCCAGCASCYGCGGTAATTCC  |
| V4F-N | CGAGCACACCAGCASCYGCGGTAATTCC |
| V4F-O | CGTATCGACCAGCASCYGCGGTAATTCC |
| V4F-P | TAGACAGTCCAGCASCYGCGGTAATTCC |
| V4F-Q | TAGCACGACCAGCASCYGCGGTAATTCC |
| V4F-R | TATGACACCCAGCASCYGCGGTAATTCC |
| V4F-S | TATGTAGACCAGCASCYGCGGTAATTCC |
| V4F-T | TCAGTACCCAGCASCYGCGGTAATTCC  |
| V4F-U | TCAGTCGTCCAGCASCYGCGGTAATTCC |
| V4F-V | TCGATACACCAGCASCYGCGGTAATTCC |
| V4F-W | TCTCATCACCAGCASCYGCGGTAATTCC |
| V4F-X | TCTGCACTCCAGCASCYGCGGTAATTCC |
| V4F-Y | TGACTAGCCCAGCASCYGCGGTAATTCC |
| V4F-Z | TGTGATGTCCAGCASCYGCGGTAATTCC |

---

Reverse primer sequences (5'-3')

---

|       |                            |
|-------|----------------------------|
| V4R-A | CAGAGACGACTTTCGTTCTTGATYRA |
| V4R-B | CAGATGACACTTTCGTTCTTGATYRA |
| V4R-C | CAGTATGCACTTTCGTTCTTGATYRA |
| V4R-D | CATAGTACTTTCGTTCTTGATYRA   |
| V4R-E | CATGTGCTACTTTCGTTCTTGATYRA |
| V4R-F | CGAGAGACACTTTCGTTCTTGATYRA |
| V4R-G | CGAGTACGACTTTCGTTCTTGATYRA |
| V4R-H | CGATGTAGACTTTCGTTCTTGATYRA |
| V4R-I | CGTATAGCACTTTCGTTCTTGATYRA |
| V4R-J | CGTGATGTACTTTCGTTCTTGATYRA |
| V4R-K | GAGATAGTACTTTCGTTCTTGATYRA |
| V4R-L | GAGTGTCTACTTTCGTTCTTGATYRA |
| V4R-M | GCATATACACTTTCGTTCTTGATYRA |
| V4R-N | GCATGACGACTTTCGTTCTTGATYRA |
| V4R-O | GCGAGTAGACTTTCGTTCTTGATYRA |
| V4R-P | GCTATGATACTTTCGTTCTTGATYRA |
| V4R-Q | GCTGATCGACTTTCGTTCTTGATYRA |
| V4R-R | TAGTAGAGACTTTCGTTCTTGATYRA |
| V4R-S | TATGATACACTTTCGTTCTTGATYRA |
| V4R-T | TCAGTAGTACTTTCGTTCTTGATYRA |
| V4R-U | TCATAGCTACTTTCGTTCTTGATYRA |
| V4R-V | TCGATGCGACTTTCGTTCTTGATYRA |
| V4R-W | TCTAGTGCACTTTCGTTCTTGATYRA |
| V4R-X | TGATGAGCACTTTCGTTCTTGATYRA |
| V4R-Y | TGTAGACTACTTTCGTTCTTGATYRA |
| V4R-Z | TGTGTGAGACTTTCGTTCTTGATYRA |

**Supplementary Table 3.** Taxa-to-samples information. For each morphological sample (columns) are indicated the number of specimens of each species sorted and identified and its ITI value.

| Taxon                                                                                     | st.1 | st.2 | st.3 | st.4 | st.5 | st.6 | st.7 | st.8 | st.9 | st.10 |
|-------------------------------------------------------------------------------------------|------|------|------|------|------|------|------|------|------|-------|
| Metazoa                                                                                   | 0    | 0    | 0    | 0    | 0    | 0    | 1    | 1    | 0    | 0     |
| Metazoa   Annelida   Capitellida   Capitellidae   Capitella   Capitella+sp                | 5904 | 3395 | 1573 | 1409 | 1489 | 214  | 1    | 2    | 0    | 3     |
| Metazoa   Annelida   Capitellida   Capitellidae   Mediomastus   Mediomastus+fragilis      | 0    | 0    | 9    | 2    | 0    | 0    | 1    | 0    | 0    | 0     |
| Metazoa   Annelida   Capitellida   Capitellidae   Notomastus   Notomastus+sp              | 0    | 1    | 3    | 0    | 0    | 0    | 4    | 8    | 12   | 9     |
| Metazoa   Annelida   Capitellida   Maldanidae   Praxillella   Praxillella+sp              | 0    | 0    | 0    | 0    | 0    | 0    | 0    | 1    | 0    | 0     |
| Metazoa   Annelida   Capitellida   Maldanidae   Rhodine   Rhodine+loveni                  | 0    | 0    | 0    | 0    | 0    | 0    | 1    | 1    | 0    | 2     |
| Metazoa   Annelida   Capitellida   Scalibregmatidae                                       | 0    | 0    | 0    | 0    | 0    | 0    | 1    | 0    | 0    | 0     |
| Metazoa   Annelida   Capitellida   Scalibregmatidae   Polyphysia   Polyphysia+crassa      | 0    | 1    | 0    | 0    | 0    | 0    | 0    | 1    | 1    | 0     |
| Metazoa   Annelida   Capitellida   Scalibregmatidae   Scalibregma   Scalibregma+inflatum  | 0    | 0    | 3    | 1    | 2    | 2    | 0    | 1    | 0    | 0     |
| Metazoa   Annelida   Eunicida   Dorvilleidae   Ophryotrocha                               | 0    | 0    | 1    | 1    | 0    | 0    | 0    | 0    | 0    | 0     |
| Metazoa   Annelida   Eunicida   Lumbrineridae   Abyssoninoe   Abyssoninoe+hibernica       | 0    | 0    | 0    | 0    | 0    | 0    | 0    | 1    | 1    | 0     |
| Metazoa   Annelida   Eunicida   Lumbrineridae   Lumbrineris   Lumbrineris+aniara          | 0    | 0    | 0    | 0    | 0    | 0    | 4    | 3    | 2    | 0     |
| Metazoa   Annelida   Eunicida   Onuphidae   Aponuphis   Aponuphis+bilineata               | 0    | 0    | 0    | 0    | 0    | 0    | 1    | 0    | 1    | 0     |
| Metazoa   Annelida   Flabelligerida   Flabelligeridae   Diplocirrus   Diplocirrus+glaucus | 0    | 0    | 0    | 0    | 0    | 0    | 3    | 2    | 2    | 1     |
| Metazoa   Annelida   Oligochaeta   Naididae   Tubificoides   Tubificoides+benedii         | 42   | 60   | 134  | 23   | 3    | 2    | 0    | 0    | 0    | 0     |
| Metazoa   Annelida   Phyllodocida   Aphroditidae   Aphrodita   Aphrodita+aculeata         | 0    | 0    | 0    | 0    | 0    | 0    | 1    | 0    | 0    | 0     |
| Metazoa   Annelida   Phyllodocida   Glyceridae   Glycera   Glycera+alba                   | 1    | 7    | 7    | 11   | 3    | 3    | 1    | 1    | 0    | 2     |
| Metazoa   Annelida   Phyllodocida   Hesionidae   Oxydromus   Oxydromus+flexuosus          | 0    | 1    | 0    | 1    | 0    | 0    | 0    | 2    | 1    | 2     |
| Metazoa   Annelida   Phyllodocida   Nephtyidae   Nephtys   Nephtys+incisa                 | 0    | 0    | 0    | 0    | 0    | 0    | 1    | 3    | 1    | 6     |
| Metazoa   Annelida   Phyllodocida   Nephtyidae   Nephtys   Nephtys+kersivalensis          | 0    | 0    | 1    | 0    | 0    | 0    | 0    | 0    | 0    | 0     |
| Metazoa   Annelida   Phyllodocida   Nereididae                                            | 0    | 0    | 0    | 0    | 0    | 0    | 1    | 0    | 0    | 0     |
| Metazoa   Annelida   Phyllodocida   Pholoidae   Pholoe   Pholoe+baltica                   | 0    | 0    | 2    | 3    | 3    | 0    | 31   | 20   | 21   | 10    |
| Metazoa   Annelida   Phyllodocida   Pholoidae   Pholoe   Pholoe+inornata                  | 0    | 0    | 0    | 0    | 0    | 0    | 0    | 0    | 2    | 0     |
| Metazoa   Annelida   Phyllodocida   Phyllodocidae   Eumida   Eumida+bahusiensis           | 0    | 1    | 0    | 0    | 0    | 0    | 0    | 4    | 3    | 5     |
| Metazoa   Annelida   Phyllodocida   Phyllodocidae   Eumida   Eumida+sanguinea             | 0    | 0    | 3    | 2    | 0    | 0    | 0    | 0    | 2    | 0     |

|                                                                                      |     |     |    |    |    |   |    |   |   |   |
|--------------------------------------------------------------------------------------|-----|-----|----|----|----|---|----|---|---|---|
| Metazoa Annelida Phyllodocida Phyllodocidae Paranaitis Paranaitis+kosteriensis       | 0   | 0   | 0  | 0  | 0  | 0 | 1  | 4 | 0 | 1 |
| Metazoa Annelida Phyllodocida Phyllodocidae Phyllodoce Phyllodoce+mucosa             | 0   | 0   | 1  | 1  | 0  | 0 | 0  | 0 | 0 | 0 |
| Metazoa Annelida Phyllodocida Phyllodocidae Sige Sige+fusigera                       | 0   | 0   | 0  | 0  | 0  | 0 | 3  | 2 | 0 | 0 |
| Metazoa Annelida Phyllodocida Pilargidae Ancistrotyllis Ancistrotyllis+groenlandica  | 0   | 0   | 0  | 0  | 0  | 0 | 0  | 1 | 2 | 1 |
| Metazoa Annelida Phyllodocida Pilargidae Litocorsa Litocorsa+stremma                 | 0   | 0   | 0  | 0  | 0  | 0 | 1  | 1 | 0 | 1 |
| Metazoa Annelida Phyllodocida Polynoidae Malmgrenia Malmgrenia+andrapolis            | 0   | 0   | 0  | 0  | 0  | 0 | 1  | 2 | 2 | 0 |
| Metazoa Annelida Phyllodocida Polynoidae Malmgrenia Malmgrenia+arenicolae            | 0   | 0   | 0  | 0  | 0  | 0 | 0  | 0 | 0 | 2 |
| Metazoa Annelida Phyllodocida Sphaerodoridae Sphaerodorum Sphaerodorum+gracilis      | 0   | 0   | 0  | 0  | 0  | 0 | 2  | 0 | 0 | 0 |
| Metazoa Annelida Scolecida Opheliidae Ophelina Ophelina+acuminata                    | 0   | 0   | 0  | 0  | 0  | 0 | 0  | 0 | 1 | 0 |
| Metazoa Annelida Scolecida Paraonidae Levinsenia Levinsenia+gracilis                 | 0   | 0   | 0  | 0  | 0  | 0 | 4  | 1 | 1 | 0 |
| Metazoa Annelida Sipuncula Golfingiidae Thysanocardia Thysanocardia+procera          | 0   | 0   | 0  | 0  | 0  | 0 | 4  | 2 | 3 | 0 |
| Metazoa Annelida Spionida Cirratulidae                                               | 0   | 0   | 0  | 0  | 0  | 0 | 1  | 0 | 0 | 0 |
| Metazoa Annelida Spionida Cirratulidae Aphelochaeta Aphelochaeta+sp                  | 0   | 0   | 0  | 0  | 0  | 0 | 0  | 0 | 0 | 1 |
| Metazoa Annelida Spionida Cirratulidae Caulleriella Caulleriella+alata               | 0   | 0   | 7  | 6  | 0  | 0 | 0  | 0 | 0 | 0 |
| Metazoa Annelida Spionida Cirratulidae Chaetozone Chaetozone+zetlandica              | 0   | 1   | 0  | 0  | 0  | 1 | 0  | 0 | 1 | 0 |
| Metazoa Annelida Spionida Cirratulidae Cirratulus Cirratulus+sp                      | 0   | 0   | 0  | 0  | 0  | 0 | 2  | 1 | 0 | 0 |
| Metazoa Annelida Spionida Cirratulidae Cirriformia Cirriformia+tentaculata           | 1   | 17  | 24 | 4  | 1  | 1 | 0  | 0 | 0 | 0 |
| Metazoa Annelida Spionida Cirratulidae Protocirrinieris Protocirrinieris+chrysoderma | 0   | 0   | 0  | 0  | 0  | 0 | 0  | 0 | 1 | 0 |
| Metazoa Annelida Spionida Magelonidae Magelona Magelona+minuta                       | 0   | 0   | 0  | 0  | 0  | 0 | 2  | 0 | 0 | 0 |
| Metazoa Annelida Spionida Spionidae Malacoceros Malacoceros+fuliginosus              | 227 | 343 | 62 | 36 | 34 | 1 | 0  | 0 | 0 | 1 |
| Metazoa Annelida Spionida Spionidae Paraspio Paraspio+decorata                       | 0   | 0   | 0  | 1  | 0  | 0 | 0  | 0 | 0 | 0 |
| Metazoa Annelida Spionida Spionidae Prionospio Prionospio+fallax                     | 0   | 0   | 0  | 0  | 0  | 0 | 1  | 2 | 0 | 1 |
| Metazoa Annelida Spionida Spionidae Spiophanes Spiophanes+kroeyeri                   | 0   | 0   | 0  | 0  | 0  | 0 | 4  | 3 | 6 | 3 |
| Metazoa Annelida Terebellida Ampharetidae Ampharete Ampharete+lindstroemi            | 0   | 0   | 0  | 0  | 0  | 0 | 3  | 2 | 2 | 0 |
| Metazoa Annelida Terebellida Ampharetidae Amphicteis Amphicteis+gunneri              | 0   | 0   | 0  | 0  | 0  | 0 | 0  | 0 | 1 | 0 |
| Metazoa Annelida Terebellida Ampharetidae Melinna Melinna+palmata                    | 0   | 0   | 0  | 0  | 0  | 0 | 28 | 9 | 1 | 0 |
| Metazoa Annelida Terebellida Amphitrite Amphitrite Amphitrite+cirrata                | 0   | 0   | 0  | 0  | 0  | 0 | 0  | 1 | 0 | 0 |
| Metazoa Annelida Terebellida Pectinariidae Pectinaria Pectinaria+belgica             | 0   | 0   | 0  | 0  | 0  | 0 | 0  | 0 | 1 | 0 |
| Metazoa Annelida Terebellida Pectinariidae Pectinaria Pectinaria+koreni              | 0   | 1   | 0  | 1  | 0  | 0 | 0  | 0 | 0 | 0 |

|                                                                                     |   |   |   |   |   |   |    |    |    |    |
|-------------------------------------------------------------------------------------|---|---|---|---|---|---|----|----|----|----|
| Metazoa Annelida Terebellida Terebellidae Amaeana Amaeana+trilobata                 | 0 | 0 | 0 | 0 | 0 | 0 | 1  | 2  | 4  | 2  |
| Metazoa Annelida Terebellida Terebellidae Amphitritinae Amphitritinae+sp            | 0 | 0 | 0 | 0 | 0 | 0 | 0  | 0  | 1  | 0  |
| Metazoa Annelida Terebellida Terebellidae Axionice Axionice+maculata                | 0 | 0 | 0 | 0 | 0 | 0 | 1  | 0  | 0  | 0  |
| Metazoa Annelida Terebellida Terebellidae Polycirrus Polycirrus+plumosus            | 0 | 0 | 0 | 0 | 0 | 0 | 17 | 17 | 24 | 13 |
| Metazoa Annelida Terebellida Terebellidae Polycirrus Polycirrus+sp                  | 0 | 0 | 0 | 0 | 0 | 0 | 3  | 1  | 0  | 0  |
| Metazoa Annelida Terebellida Terebellidae Terebellides Terebellides+stroemii        | 0 | 0 | 0 | 0 | 0 | 0 | 20 | 2  | 1  | 0  |
| Metazoa Arthropoda Chelicerata Pycnogonida Anoplodactylus Anoplodactylus+petiolatus | 0 | 0 | 0 | 0 | 0 | 0 | 0  | 0  | 0  | 1  |
| Metazoa Arthropoda Crustacea Malacostraca Ampelisca Ampelisca+diadema               | 0 | 0 | 0 | 0 | 0 | 0 | 1  | 1  | 0  | 0  |
| Metazoa Arthropoda Crustacea Malacostraca Ampelisca Ampelisca+tenuicornis           | 0 | 0 | 0 | 0 | 0 | 0 | 0  | 0  | 1  | 0  |
| Metazoa Arthropoda Crustacea Malacostraca Autonoe Autonoe+longipes                  | 0 | 0 | 0 | 0 | 0 | 0 | 1  | 0  | 0  | 0  |
| Metazoa Arthropoda Crustacea Malacostraca Decapoda                                  | 0 | 0 | 0 | 0 | 0 | 0 | 0  | 0  | 0  | 1  |
| Metazoa Arthropoda Crustacea Malacostraca Decapoda Decapoda_X                       | 0 | 0 | 0 | 0 | 0 | 0 | 0  | 0  | 0  | 1  |
| Metazoa Arthropoda Crustacea Malacostraca Eudorella Eudorella+emarginata            | 0 | 0 | 0 | 0 | 0 | 0 | 1  | 0  | 0  | 0  |
| Metazoa Arthropoda Crustacea Malacostraca Jassa Jassa+sp                            | 0 | 0 | 0 | 0 | 0 | 0 | 0  | 0  | 0  | 1  |
| Metazoa Arthropoda Crustacea Malacostraca Leucothoe Leucothoe+lilljeborgi           | 0 | 0 | 0 | 0 | 0 | 0 | 0  | 0  | 1  | 0  |
| Metazoa Arthropoda Crustacea Malacostraca Microdeutopus Microdeutopus+anomalus      | 0 | 0 | 2 | 1 | 0 | 2 | 0  | 0  | 0  | 0  |
| Metazoa Arthropoda Crustacea Malacostraca Nebalia Nebalia+herbstii                  | 0 | 1 | 0 | 0 | 0 | 0 | 0  | 0  | 0  | 0  |
| Metazoa Arthropoda Crustacea Malacostraca Pariambus Pariambus+typicus               | 0 | 1 | 0 | 0 | 0 | 1 | 0  | 0  | 0  | 0  |
| Metazoa Arthropoda Crustacea Maxillopoda Balanus Balanus+sp                         | 0 | 0 | 0 | 0 | 0 | 1 | 0  | 0  | 0  | 0  |
| Metazoa Arthropoda Crustacea Maxillopoda Calanus Calanus+finmarchicus               | 0 | 0 | 0 | 0 | 0 | 0 | 0  | 0  | 0  | 1  |
| Metazoa Arthropoda Crustacea Maxillopoda Calanus Calanus+helgolandicus              | 0 | 1 | 0 | 0 | 0 | 0 | 0  | 0  | 0  | 0  |
| Metazoa Arthropoda Crustacea Maxillopoda Copepoda                                   | 0 | 0 | 0 | 0 | 0 | 1 | 0  | 0  | 0  | 0  |
| Metazoa Arthropoda Crustacea Maxillopoda Verruca Verruca+stroemia                   | 0 | 0 | 0 | 0 | 0 | 0 | 0  | 0  | 2  | 0  |
| Metazoa Arthropoda Hexapoda Insecta Chironomidae                                    | 0 | 0 | 1 | 0 | 0 | 0 | 0  | 0  | 0  | 0  |
| Metazoa Bryozoa                                                                     | 1 | 0 | 0 | 0 | 0 | 0 | 0  | 0  | 0  | 0  |
| Metazoa Cnidaria Cnidaria_X Anthozoa Edwardsia Edwardsia+claparedii                 | 0 | 0 | 0 | 0 | 0 | 0 | 1  | 0  | 1  | 0  |
| Metazoa Cnidaria Cnidaria_X Anthozoa Pennatula Pennatula+phosphorea                 | 0 | 0 | 0 | 0 | 0 | 0 | 0  | 0  | 1  | 0  |
| Metazoa Echinodermata Echinodermata_X Holothuroidea Labidoplax Labidoplax+sp        | 0 | 0 | 0 | 0 | 0 | 0 | 1  | 0  | 0  | 0  |
| Metazoa Echinodermata Ophiuroidea                                                   | 0 | 0 | 2 | 0 | 0 | 0 | 0  | 0  | 0  | 0  |

|                                                                              |    |    |    |   |   |   |    |    |    |    |
|------------------------------------------------------------------------------|----|----|----|---|---|---|----|----|----|----|
| Metazoa Echinodermata Ophiuroidea Amphiuridae                                | 0  | 0  | 0  | 0 | 0 | 0 | 11 | 7  | 0  | 1  |
| Metazoa Echinodermata Ophiuroidea Amphiuridae Amphiura Amphiura+chiajei      | 0  | 0  | 0  | 0 | 0 | 0 | 12 | 10 | 7  | 11 |
| Metazoa Echinodermata Ophiuroidea Amphiuridae Amphiura Amphiura+filiformis   | 0  | 0  | 0  | 0 | 0 | 0 | 1  | 7  | 25 | 2  |
| Metazoa Entoprocta                                                           | 0  | 1  | 0  | 0 | 0 | 0 | 0  | 0  | 5  | 0  |
| Metazoa Mollusca Aplacophora Aplacophora_X Chaetoderma Chaetoderma+nitidulum | 0  | 0  | 0  | 0 | 0 | 0 | 0  | 0  | 1  | 0  |
| Metazoa Mollusca Aplacophora Aplacophora_X Falcidens Falcidens+crossotus     | 0  | 0  | 0  | 0 | 0 | 0 | 1  | 1  | 5  | 0  |
| Metazoa Mollusca Aplacophora Aplacophora_X Scutopus Scutopus+ventrolineatus  | 0  | 0  | 0  | 0 | 0 | 0 | 0  | 0  | 0  | 2  |
| Metazoa Mollusca Bivalvia Anomalodesmata Thracia Thracia+sp                  | 0  | 0  | 2  | 4 | 5 | 6 | 0  | 0  | 0  | 0  |
| Metazoa Mollusca Bivalvia Heteroconchia Abra Abra+alba                       | 0  | 0  | 12 | 1 | 0 | 0 | 1  | 0  | 1  | 0  |
| Metazoa Mollusca Bivalvia Heteroconchia Abra Abra+nitida                     | 0  | 2  | 2  | 2 | 0 | 0 | 1  | 0  | 16 | 0  |
| Metazoa Mollusca Bivalvia Heteroconchia Angulus Angulus+fabula               | 0  | 0  | 1  | 0 | 0 | 0 | 0  | 0  | 0  | 0  |
| Metazoa Mollusca Bivalvia Heteroconchia Angulus Angulus+pygmaeus             | 0  | 0  | 1  | 0 | 0 | 0 | 0  | 0  | 0  | 0  |
| Metazoa Mollusca Bivalvia Heteroconchia Chamelea Chamelea+striatula          | 0  | 0  | 0  | 0 | 0 | 0 | 0  | 1  | 0  | 0  |
| Metazoa Mollusca Bivalvia Heteroconchia Myrtea Myrtea+spinifera              | 0  | 0  | 0  | 0 | 0 | 0 | 5  | 7  | 2  | 0  |
| Metazoa Mollusca Bivalvia Heteroconchia Parvicardium Parvicardium+scabrum    | 0  | 0  | 0  | 0 | 0 | 0 | 0  | 1  | 0  | 0  |
| Metazoa Mollusca Bivalvia Heteroconchia Venerupis Venerupis+corrugata        | 0  | 0  | 0  | 1 | 0 | 0 | 0  | 0  | 0  | 0  |
| Metazoa Mollusca Bivalvia Heterodonta Corbula Corbula+gibba                  | 0  | 0  | 0  | 0 | 0 | 0 | 24 | 19 | 1  | 8  |
| Metazoa Mollusca Bivalvia Heterodonta Kurtiella Kurtiella+bidentata          | 1  | 0  | 0  | 0 | 0 | 0 | 14 | 22 | 17 | 15 |
| Metazoa Mollusca Bivalvia Lucinoida Thyasira Thyasira+flexuosa               | 0  | 4  | 0  | 1 | 0 | 3 | 3  | 2  | 2  | 3  |
| Metazoa Mollusca Bivalvia Mytiloida Modiolus Modiolus+modiolus               | 0  | 0  | 1  | 0 | 0 | 0 | 0  | 0  | 0  | 0  |
| Metazoa Mollusca Bivalvia Mytiloida Mytilus Mytilus+edulis                   | 0  | 0  | 1  | 0 | 1 | 0 | 0  | 0  | 0  | 0  |
| Metazoa Mollusca Bivalvia Protobranchia Nucula Nucula+nitidosa               | 0  | 0  | 0  | 0 | 0 | 0 | 3  | 0  | 3  | 0  |
| Metazoa Mollusca Bivalvia Protobranchia Nucula Nucula+sulcata                | 0  | 0  | 0  | 0 | 0 | 1 | 0  | 0  | 2  | 1  |
| Metazoa Mollusca Gastropoda Caenogastropoda Turritella Turritella+communis   | 0  | 0  | 0  | 0 | 0 | 0 | 5  | 3  | 3  | 0  |
| Metazoa Mollusca Gastropoda Heterobranchia Alvania Alvania+testae            | 0  | 0  | 0  | 0 | 0 | 0 | 0  | 0  | 1  | 0  |
| Metazoa Mollusca Gastropoda Heterobranchia Bela Bela+brachystoma             | 0  | 0  | 0  | 0 | 0 | 0 | 0  | 2  | 0  | 0  |
| Metazoa Mollusca Gastropoda Heterobranchia Crisilla Crisilla+semistriata     | 0  | 0  | 0  | 0 | 0 | 3 | 0  | 0  | 0  | 0  |
| Metazoa Mollusca Gastropoda Heterobranchia Cylichna Cylichna+cylindracea     | 0  | 0  | 0  | 0 | 0 | 0 | 2  | 3  | 0  | 2  |
| Metazoa Mollusca Gastropoda Heterobranchia Hyala Hyala+vitrea                | 24 | 41 | 0  | 0 | 0 | 0 | 51 | 25 | 16 | 10 |



|                                                                            |     |     |     |     |     |     |    |   |   |   |
|----------------------------------------------------------------------------|-----|-----|-----|-----|-----|-----|----|---|---|---|
| Metazoa Mollusca Gastropoda Heterobranchia Odostomia Odostomia+sp          | 0   | 0   | 0   | 2   | 0   | 0   | 1  | 0 | 0 | 0 |
| Metazoa Mollusca Gastropoda Heterobranchia Opisthobranchia                 | 0   | 1   | 0   | 0   | 0   | 0   | 0  | 0 | 0 | 0 |
| Metazoa Nematoda                                                           | 0   | 0   | 0   | 0   | 0   | 0   | 0  | 1 | 0 | 0 |
| Metazoa Nemertea                                                           | 883 | 506 | 415 | 166 | 154 | 124 | 2  | 0 | 0 | 5 |
| Metazoa Priapulida Priapulida_X Priapulida_XX Priapulus Priapulus+caudatus | 0   | 0   | 0   | 0   | 0   | 0   | 11 | 3 | 4 | 0 |

---

**Supplementary Table 4.** Sequencing statistics for raw data filtering and metazoa sequence selection

| Sample | Replicate | DNA   |          |         | RNA    |          |         |
|--------|-----------|-------|----------|---------|--------|----------|---------|
|        |           | Total | Filtered | Metazoa | Total  | Filtered | Metazoa |
| 1      | 1         | 63    | 0        | 0       | 64701  | 41540    | 5722    |
|        | 2         | 277   | 0        | 0       | 74863  | 50935    | 4984    |
|        | 3         | 360   | 2        | 2       | 101137 | 72790    | 7684    |
|        | 4         | 186   | 0        | 0       | 75131  | 49745    | 21914   |
|        | 5         | 32927 | 23950    | 14364   | 81610  | 53277    | 8673    |
| 2      | 1         | 63467 | 45859    | 19807   | 56900  | 33003    | 8047    |
|        | 2         | 46872 | 34143    | 16822   | 89899  | 57407    | 13884   |
|        | 3         | 47392 | 36746    | 26435   | 78981  | 51026    | 18216   |
|        | 4         | 41341 | 25101    | 15108   | 89462  | 60725    | 33207   |
|        | 5         | 101   | 0        | 0       | 69936  | 42371    | 6460    |
| 3      | 1         | 54005 | 40193    | 30808   | 51313  | 32803    | 2705    |
|        | 2         | 54667 | 37664    | 21788   | 27349  | 16034    | 719     |
|        | 3         | 95313 | 70045    | 58621   | 47045  | 27471    | 11867   |
|        | 4         | 57515 | 35555    | 24463   | 47743  | 29308    | 4281    |
|        | 5         | 75916 | 56167    | 52189   | 48787  | 27251    | 6154    |
| 4      | 1         | 57239 | 40770    | 33092   | 33301  | 18305    | 8908    |
|        | 2         | 40740 | 26360    | 11194   | 31227  | 16649    | 3923    |
|        | 3         | 45131 | 30293    | 14546   | 14876  | 7816     | 3761    |
|        | 4         | 53333 | 34802    | 17818   | 48072  | 27111    | 5496    |
|        | 5         | 44681 | 27890    | 13242   | 54618  | 29191    | 13436   |
| 5      | 1         | 35220 | 24260    | 7450    | 34641  | 19318    | 2630    |
|        | 2         | 38470 | 25747    | 7560    | 45227  | 24889    | 3471    |
|        | 3         | 34080 | 25702    | 24721   | 56538  | 38415    | 25037   |
|        | 4         | 45308 | 30633    | 14736   | 24479  | 13913    | 4752    |

|    |   |       |       |       |       |       |       |
|----|---|-------|-------|-------|-------|-------|-------|
|    | 5 | 40271 | 26089 | 7658  | 18723 | 9634  | 2736  |
| 6  | 1 | 42069 | 31596 | 12402 | 46909 | 32947 | 4962  |
|    | 2 | 35947 | 26029 | 18188 | 45782 | 31084 | 1708  |
|    | 3 | 51948 | 38820 | 10639 | 22990 | 13858 | 1711  |
|    | 4 | 59477 | 43298 | 15456 | 18149 | 9467  | 1338  |
|    | 5 | 26835 | 18071 | 6474  | 37655 | 23826 | 2885  |
| 7  | 1 | 24552 | 13211 | 2353  | 75799 | 45633 | 6542  |
|    | 2 | 17914 | 9176  | 9030  | 29187 | 16430 | 3064  |
|    | 3 | 24058 | 12130 | 4844  | 33002 | 19273 | 568   |
|    | 4 | 20908 | 12893 | 2292  | 34272 | 22315 | 5420  |
|    | 5 | 30718 | 15147 | 3220  | 7261  | 3812  | 331   |
| 8  | 1 | 44719 | 29208 | 1911  | 16850 | 10080 | 134   |
|    | 2 | 13278 | 7455  | 2067  | 28189 | 18872 | 437   |
|    | 3 | 19570 | 12833 | 1317  | 36023 | 24073 | 1831  |
|    | 4 | 61004 | 43801 | 27826 | 37888 | 24264 | 3144  |
|    | 5 | 66132 | 42238 | 8915  | 21188 | 13057 | 690   |
| 9  | 1 | 55438 | 38000 | 840   | 92087 | 64950 | 954   |
|    | 2 | 45706 | 27590 | 1829  | 81749 | 58978 | 859   |
|    | 3 | 17046 | 8120  | 827   | 51098 | 28706 | 185   |
|    | 4 | 29596 | 19431 | 1899  | 74333 | 46053 | 1408  |
|    | 5 | 49640 | 37093 | 1028  | 43557 | 27191 | 117   |
| 10 | 1 | 33266 | 20322 | 10985 | 75296 | 53879 | 14649 |
|    | 2 | 53124 | 40025 | 1887  | 96476 | 67556 | 387   |
|    | 3 | 30109 | 20822 | 198   | 77214 | 50313 | 83    |
|    | 4 | 25442 | 15863 | 1786  | 57201 | 36535 | 6569  |
|    | 5 | 40795 | 26600 | 2937  | 60905 | 40262 | 7084  |

---

**Supplementary table 5.** Pairwise Wilcoxon Mann-Whitney tests (False Discovery Rate correction)

Pairwise comparisons of the number of specimens among morphology samples

|   | 3        | 4        | 5     | 6        | 7       | 8     | 9     | 2     | 1    |
|---|----------|----------|-------|----------|---------|-------|-------|-------|------|
| 3 | 0.709    | -        | -     | -        | -       | -     | -     | -     | -    |
| 4 | 0.015**  | 0.035*   | -     | -        | -       | -     | -     | -     | -    |
| 5 | 0.139    | 0.268    | 0.308 | -        | -       | -     | -     | -     | -    |
| 6 | 0.001*** | 0***     | 0***  | 0***     | -       | -     | -     | -     | -    |
| 7 | 0.005*** | 0.001*** | 0***  | 0***     | 0.594   | -     | -     | -     | -    |
| 8 | 0.004*** | 0.001*** | 0***  | 0***     | 0.594   | 0.960 | -     | -     | -    |
| 9 | 0.437    | 0.659    | 0.090 | 0.537    | 0***    | 0***  | 0***  | -     | -    |
| 2 | 0.008*** | 0.019**  | 0.838 | 0.210    | 0***    | 0***  | 0***  | 0.057 | -    |
| 1 | 0.253    | 0.112    | 0***  | 0.006*** | 0.021** | 0.088 | 0.088 | 0.04* | 0*** |

Pairwise comparisons of the number of sequence reads among DNA samples

|   | 3      | 4      | 5      | 6      | 7      | 8     | 9     | 2     | 1     |
|---|--------|--------|--------|--------|--------|-------|-------|-------|-------|
| 3 | 0.119  | -      | -      | -      | -      | -     | -     | -     | -     |
| 4 | 0.079  | 0.455  | -      | -      | -      | -     | -     | -     | -     |
| 5 | 0.036* | 0.498  | 0.901  | -      | -      | -     | -     | -     | -     |
| 6 | 0.036* | 0.036* | 0.119  | 0.051  | -      | -     | -     | -     | -     |
| 7 | 0.079  | 0.186  | 0.498  | 0.37   | 0.616  | -     | -     | -     | -     |
| 8 | 0.036* | 0.036* | 0.036* | 0.036* | 0.036* | 0.079 | -     | -     | -     |
| 9 | 0.13   | 0.498  | 0.2    | 0.2    | 0.051  | 0.33  | 0.051 | -     | -     |
| 2 | 0.455  | 1      | 1      | 1      | 0.455  | 0.732 | 0.455 | 0.498 | -     |
| 1 | 0.036  | 0.036* | 0.119  | 0.079  | 0.455  | 0.616 | 0.498 | 0.051 | 0.455 |

Pairwise comparisons of the number of sequence reads among RNA samples

|   | 3      | 4     | 5       | 6       | 7       | 8       | 9       | 2       | 1     |
|---|--------|-------|---------|---------|---------|---------|---------|---------|-------|
| 3 | 0.77 - | -     | -       | -       | -       | -       | -       | -       | -     |
| 4 | 1      | 0.6 - | -       | -       | -       | -       | -       | -       | -     |
| 5 | 0.676  | 0.13  | 0.526 - | -       | -       | -       | -       | -       | -     |
| 6 | 0.77   | 0.399 | 0.818   | 0.923 - | -       | -       | -       | -       | -     |
| 7 | 0.19   | 0.089 | 0.13    | 0.6     | 0.676 - | -       | -       | -       | -     |
| 8 | 0.19   | 0.089 | 0.089   | 0.089   | 0.526   | 0.818 - | -       | -       | -     |
| 9 | 0.13   | 0.19  | 0.312   | 0.089   | 0.089   | 0.089   | 0.089 - | -       | -     |
| 2 | 0.818  | 1     | 0.818   | 0.6     | 0.6     | 0.6     | 0.6     | 0.923 - | -     |
| 1 | 1      | 0.923 | 1       | 0.818   | 0.77    | 0.77    | 0.676   | 0.19    | 0.818 |

**Supplementary table 6.** Pairwise Wilcoxon Mann-Whitney tests among DNA or among RNA samples (False Discovery Rate correction)

Pairwise comparisons of the number of OTUs among DNA samples

|   | 3     | 4     | 5     | 6     | 7     | 8     | 9     | 2     | 1     |
|---|-------|-------|-------|-------|-------|-------|-------|-------|-------|
| 3 | 0.342 | -     | -     | -     | -     | -     | -     | -     | -     |
| 4 | 0.655 | 0.655 | -     | -     | -     | -     | -     | -     | -     |
| 5 | 0.977 | 0.280 | 0.531 | -     | -     | -     | -     | -     | -     |
| 6 | 0.001 | 0.002 | 0.001 | 0.000 | -     | -     | -     | -     | -     |
| 7 | 0.021 | 0.031 | 0.016 | 0.004 | 0.330 | -     | -     | -     | -     |
| 8 | 0.074 | 0.251 | 0.159 | 0.031 | 0.003 | 0.087 | -     | -     | -     |
| 9 | 0.251 | 0.019 | 0.087 | 0.211 | 0.000 | 0.003 | 0.003 | -     | -     |
| 2 | 0.004 | 0.002 | 0.003 | 0.003 | 0.002 | 0.003 | 0.002 | 0.008 | -     |
| 1 | 0.000 | 0.000 | 0.000 | 0.000 | 0.000 | 0.000 | 0.000 | 0.003 | 0.061 |

Pairwise comparisons of the number of OTUs among RNA samples

|   | 3     | 4     | 5     | 6     | 7     | 8     | 9     | 2     | 1     |
|---|-------|-------|-------|-------|-------|-------|-------|-------|-------|
| 3 | 0.742 | -     | -     | -     | -     | -     | -     | -     | -     |
| 4 | 0.728 | 0.930 | -     | -     | -     | -     | -     | -     | -     |
| 5 | 0.413 | 0.779 | 0.724 | -     | -     | -     | -     | -     | -     |
| 6 | 0.877 | 0.723 | 0.651 | 0.325 | -     | -     | -     | -     | -     |
| 7 | 0.355 | 0.553 | 0.533 | 0.799 | 0.330 | -     | -     | -     | -     |
| 8 | 0.000 | 0.012 | 0.002 | 0.002 | 0.001 | 0.036 | -     | -     | -     |
| 9 | 0.877 | 0.877 | 0.880 | 0.557 | 0.724 | 0.413 | 0.001 | -     | -     |
| 2 | 0.006 | 0.079 | 0.036 | 0.072 | 0.012 | 0.238 | 0.413 | 0.017 | -     |
| 1 | 0.000 | 0.002 | 0.001 | 0.001 | 0.001 | 0.004 | 0.352 | 0.001 | 0.091 |















## Supplementary Table 7. continued

| OTU   | assign                                                                     | DNA_4_1 | DNA_4_2 | DNA_4_3 | DNA_4_4 | DNA_4_5 | DNA_5_1 | DNA_5_2 | DNA_5_3 | DNA_5_4 | DNA_5_5 |
|-------|----------------------------------------------------------------------------|---------|---------|---------|---------|---------|---------|---------|---------|---------|---------|
| OTU1  | Metazoa Annelida Capitellida Capitellidae Capitella                        | 3359.67 | 345.91  | 1218.95 | 0       | 0       | 2170.69 | 1.23    | 3770.13 | 433.46  | 5.35    |
| OTU2  | Metazoa Annelida Oligochaeta Tubificidae                                   | 259.49  | 1942.06 | 2285.42 | 2745.99 | 2317.17 | 2.13    | 379.21  | 50.59   | 2941.38 | 2151.51 |
| OTU4  | Metazoa Annelida Phyllodocida Phyllodocidae Phyllodoce Phyllodoce+maculata | 15.5    | 67.09   | 82.86   | 27.73   | 0       | 100.93  | 2.14    | 41.87   | 392.74  | 1587.72 |
| OTU5  | Metazoa Annelida Spionida Spionidae Malacoceros Malacoceros+fuliginosus    | 0       | 0       | 0       | 0       | 0       | 0       | 0       | 0       | 0       | 0       |
| OTU6  | Metazoa Annelida Spionida Cirratulidae                                     | 321.84  | 1456.94 | 403.71  | 1107.08 | 1208.68 | 1358.18 | 922.58  | 211.8   | 199.64  | 0       |
| OTU7  | Metazoa Platyhelminthes                                                    | 14.55   | 61.42   | 0       | 42.15   | 18.19   | 0       | 44.05   | 0       | 51.99   | 90.83   |
| OTU8  | Metazoa Annelida Phyllodocida Syllidae Salvatoria                          | 0       | 0       | 0       | 0       | 0       | 0       | 2365.25 | 11.41   | 0       | 0       |
| OTU9  | Metazoa Annelida                                                           | 0       | 0       | 0       | 0       | 0       | 0       | 65.09   | 0       | 0       | 0       |
| OTU10 | Metazoa Nematoda                                                           | 0       | 0       | 0       | 0       | 91.13   | 0       | 0       | 0       | 0       | 0       |
| OTU11 | Metazoa Nematoda                                                           | 4.17    | 3.78    | 10.99   | 0       | 0       | 192.14  | 126.24  | 4.1     | 15.15   | 96.52   |
| OTU12 | Metazoa Nematoda                                                           | 23.47   | 122.38  | 37.99   | 133.24  | 119.75  | 38.7    | 15.92   | 1.71    | 5.42    | 25.91   |
| OTU13 | Metazoa Cnidaria Cnidaria_X Anthozoa                                       | 0       | 0       | 0       | 0       | 0       | 0       | 0       | 0       | 0       | 0       |
| OTU14 | Metazoa Nemertea                                                           | 0       | 0       | 0       | 0       | 0       | 0       | 0       | 0       | 0       | 0       |
| OTU15 | Metazoa Mollusca Bivalvia Heteroconchia Abra                               | 0       | 0       | 0       | 0       | 0       | 0       | 0       | 0       | 0       | 0       |
| OTU16 | Metazoa Platyhelminthes                                                    | 0       | 0       | 0       | 0       | 0       | 0       | 0       | 0       | 0       | 0       |
| OTU17 | Metazoa Cnidaria Cnidaria_X Hydrozoa                                       | 2.64    | 0       | 0       | 0       | 0       | 0       | 0       | 0       | 0       | 0       |
| OTU18 | Metazoa Platyhelminthes                                                    | 0       | 19.88   | 0       | 0       | 23.84   | 1.68    | 56.99   | 0       | 15.83   | 0       |
| OTU19 | Metazoa Arthropoda Crustacea Ostracoda                                     | 0       | 0       | 0       | 0       | 0       | 0       | 0       | 0       | 0       | 0       |
| OTU20 | Metazoa Nematoda                                                           | 0       | 15.18   | 20.48   | 11.89   | 10.1    | 44.44   | 53.9    | 5.96    | 8.47    | 47.12   |
| OTU21 | Metazoa Annelida Terebellida Ampharetidae                                  | 0       | 0       | 0       | 0       | 0       | 0       | 0       | 0       | 0       | 0       |
| OTU22 | Metazoa Annelida Phyllodocida Syllidae Exogone Exogone+naidina             | 0       | 0       | 0       | 0       | 0       | 0       | 0       | 0       | 0       | 0       |
| OTU23 | Metazoa Platyhelminthes                                                    | 0       | 0       | 0       | 0       | 0       | 0       | 0       | 0       | 0       | 0       |
| OTU24 | Metazoa Platyhelminthes                                                    | 0       | 0       | 0       | 0       | 0       | 0       | 0       | 0       | 0       | 0       |
| OTU25 | Metazoa Mollusca Bivalvia Heteroconchia Corbula                            | 0       | 0       | 0       | 0       | 0       | 0       | 0       | 0       | 0       | 0       |
| OTU26 | Metazoa Annelida Capitellida Capitellidae Heteromastus                     | 3.64    | 0       | 12.68   | 0       | 34.37   | 65.18   | 0       | 2.94    | 0       | 0       |

|       |                                                                               |       |       |      |       |        |       |       |   |       |       |
|-------|-------------------------------------------------------------------------------|-------|-------|------|-------|--------|-------|-------|---|-------|-------|
| OTU27 | Metazoa Arthropoda Crustacea Maxillopoda Copepoda                             | 0     | 0     | 0    | 0     | 0      | 0     | 0     | 0 | 0     | 0     |
| OTU28 | Metazoa Nematoda                                                              | 1.48  | 14.4  | 5.22 | 3.77  | 8.93   | 40.31 | 18.46 | 0 | 11.67 | 30.49 |
| OTU29 | Metazoa Cnidaria Cnidaria_X Hydrozoa                                          | 0     | 0     | 0    | 0     | 0      | 0     | 0     | 0 | 0     | 0     |
| OTU30 | Metazoa Mollusca Gastropoda Heterobranchia Bulla                              | 0     | 0     | 0    | 0     | 207.45 | 0     | 0     | 0 | 0     | 0     |
| OTU31 | Metazoa Platyhelminthes                                                       | 0     | 0     | 0    | 0     | 0      | 0     | 0     | 0 | 0     | 0     |
| OTU32 | Metazoa Arthropoda Crustacea Ostracoda                                        | 0     | 0     | 0    | 11.48 | 0      | 42.24 | 6.36  | 0 | 0     | 0     |
| OTU33 | Metazoa Nemertea                                                              | 0     | 0     | 0    | 0     | 0      | 0     | 0     | 0 | 0     | 0     |
| OTU35 | Metazoa Nemertea                                                              | 0     | 0     | 0    | 0     | 0      | 0     | 0     | 0 | 0     | 0     |
| OTU36 | Metazoa Arthropoda Chelicerata                                                | 4.76  | 0     | 0    | 5.45  | 0      | 3.44  | 0     | 0 | 0     | 0     |
| OTU37 | Metazoa Annelida Phyllodocida Syllidae Erinaceusyllis Erinaceusyllis+cryptica | 0     | 0     | 0    | 0     | 0      | 0     | 0     | 0 | 0     | 0     |
| OTU38 | Metazoa Platyhelminthes                                                       | 0     | 0     | 0    | 0     | 0      | 0     | 0     | 0 | 0     | 0     |
| OTU39 | Metazoa Arthropoda Crustacea Maxillopoda Copepoda                             | 0     | 24.99 | 2.8  | 0     | 29.36  | 15.04 | 20.94 | 0 | 12.22 | 12.33 |
| OTU40 | Metazoa Annelida Capitellida Maldanidae Praxillella                           | 0     | 0     | 0    | 0     | 0      | 0     | 0     | 0 | 0     | 0     |
| OTU41 | Metazoa Arthropoda Crustacea Maxillopoda Copepoda                             | 59.87 | 0     | 0    | 0     | 0      | 0     | 0     | 0 | 0     | 0     |
| OTU42 | Metazoa Annelida Phyllodocida Syllidae Exogone Exogone+naidina                | 0     | 0     | 0    | 0     | 0      | 0     | 0     | 0 | 0     | 0     |
| OTU43 | Metazoa Hemichordata                                                          | 0     | 0     | 0    | 0     | 0      | 0     | 0     | 0 | 0     | 0     |
| OTU44 | Metazoa Cnidaria Cnidaria_X Hydrozoa                                          | 0     | 0     | 0    | 0     | 0      | 0     | 0     | 0 | 3.01  | 0     |
| OTU45 | Metazoa Mollusca Bivalvia Protobranchia Nucula                                | 0     | 0     | 0    | 3.18  | 0      | 0     | 0     | 0 | 0     | 0     |
| OTU46 | Metazoa Annelida Capitellida Capitellidae Capitella                           | 0     | 0     | 0    | 0     | 0      | 0     | 0     | 0 | 0     | 0     |
| OTU47 | Metazoa Platyhelminthes                                                       | 0     | 0     | 0    | 0     | 0      | 0     | 0     | 0 | 0     | 0     |
| OTU48 | Metazoa Platyhelminthes                                                       | 0     | 0     | 0    | 0     | 0      | 0     | 0     | 0 | 0     | 0     |
| OTU49 | Metazoa Platyhelminthes                                                       | 0     | 0     | 0    | 0     | 0      | 0     | 0     | 0 | 0     | 0     |
| OTU51 | Metazoa Nematoda                                                              | 4.03  | 6.79  | 0    | 6.55  | 9.08   | 19.62 | 13.16 | 0 | 6.08  | 37.77 |
| OTU52 | Metazoa Annelida Capitellida Maldanidae                                       | 0     | 0     | 0    | 0     | 0      | 0     | 0     | 0 | 0     | 0     |
| OTU53 | Metazoa Nematoda                                                              | 8.32  | 10.91 | 0    | 0     | 0      | 2.69  | 0     | 0 | 1.77  | 4.31  |
| OTU54 | Metazoa Annelida Oligochaeta Tubificidae                                      | 0     | 0     | 0    | 0     | 0      | 0     | 0     | 0 | 0     | 0     |
| OTU55 | Metazoa Platyhelminthes                                                       | 0     | 0     | 0    | 0     | 0      | 0     | 0     | 0 | 0     | 0     |
| OTU56 | Metazoa Platyhelminthes                                                       | 0     | 0     | 0    | 0     | 0      | 0     | 0     | 0 | 0     | 0     |
| OTU58 | Metazoa Nematoda                                                              | 0     | 6.3   | 3.04 | 1.6   | 19.55  | 2.21  | 0     | 0 | 0     | 2.01  |











## Supplementary Table 7. continued

| OTU   | assign                                                                     | DNA_6_1 | DNA_6_2 | DNA_6_3 | DNA_6_4 | DNA_6_5 | DNA_7_1 | DNA_7_2 | DNA_7_3 | DNA_7_4 | DNA_7_5 |
|-------|----------------------------------------------------------------------------|---------|---------|---------|---------|---------|---------|---------|---------|---------|---------|
| OTU1  | Metazoa Annelida Capitellida Capitellidae Capitella                        | 2807.39 | 2780.39 | 3299.36 | 2096.31 | 2163.16 | 0       | 0       | 0       | 0       | 0       |
| OTU2  | Metazoa Annelida Oligochaeta Tubificidae                                   | 238.28  | 13.48   | 131.97  | 378.68  | 510.81  | 0       | 0       | 0       | 0       | 0       |
| OTU4  | Metazoa Annelida Phyllodocida Phyllodocidae Phyllodoce Phyllodoce+maculata | 0       | 7.67    | 0       | 148.7   | 114.44  | 0       | 3569.67 | 0       | 0       | 0       |
| OTU5  | Metazoa Annelida Spionida Spionidae Malacoceros Malacoceros+fuliginosus    | 0       | 0       | 0       | 0       | 0       | 0       | 0       | 0       | 0       | 0       |
| OTU6  | Metazoa Annelida Spionida Cirratulidae                                     | 0       | 0       | 0       | 0       | 0       | 0       | 0       | 0       | 0       | 0       |
| OTU7  | Metazoa Platyhelminthes                                                    | 23.64   | 216.41  | 182.76  | 31.08   | 601.8   | 46.55   | 16.72   | 3270.95 | 0       | 77.34   |
| OTU8  | Metazoa Annelida Phyllodocida Syllidae Salvatoria                          | 942.58  | 961.39  | 3.83    | 1281.81 | 57.04   | 0       | 0       | 0       | 4.11    | 498.7   |
| OTU9  | Metazoa Annelida                                                           | 1.01    | 1.17    | 55.64   | 69.29   | 0       | 486.21  | 404.19  | 0       | 1238.57 | 871.19  |
| OTU10 | Metazoa Nematoda                                                           | 0       | 0       | 0       | 0       | 0       | 0       | 0       | 0       | 0       | 0       |
| OTU11 | Metazoa Nematoda                                                           | 0       | 0       | 0       | 2.39    | 0       | 0       | 0       | 0       | 0       | 0       |
| OTU12 | Metazoa Nematoda                                                           | 19.69   | 25.65   | 137.13  | 47.14   | 94.97   | 0       | 0       | 0       | 0       | 4.17    |
| OTU13 | Metazoa Cnidaria Cnidaria_X Anthozoa                                       | 0       | 0       | 0       | 0       | 0       | 0       | 0       | 0       | 0       | 0       |
| OTU14 | Metazoa Nemertea                                                           | 0       | 0       | 0       | 0       | 0       | 0       | 28.72   | 0       | 0       | 0       |
| OTU15 | Metazoa Mollusca Bivalvia Heteroconchia Abra                               | 0       | 0       | 0       | 0       | 0       | 0       | 0       | 0       | 6.3     | 38.99   |
| OTU16 | Metazoa Platyhelminthes                                                    | 0       | 0       | 0       | 0       | 0       | 470.94  | 7.02    | 26.64   | 43.7    | 139.46  |
| OTU17 | Metazoa Cnidaria Cnidaria_X Hydrozoa                                       | 0       | 0       | 0       | 1.44    | 0       | 0       | 0       | 14.47   | 14.02   | 218.58  |
| OTU18 | Metazoa Platyhelminthes                                                    | 5.55    | 4.29    | 90.35   | 20.5    | 53.18   | 141.97  | 0       | 9.14    | 0       | 0       |
| OTU19 | Metazoa Arthropoda Crustacea Ostracoda                                     | 0       | 0       | 0       | 0       | 0       | 104.68  | 0       | 88.11   | 22.35   | 15.6    |
| OTU20 | Metazoa Nematoda                                                           | 4.89    | 2.52    | 42.03   | 5.16    | 29.78   | 0       | 0       | 0       | 0       | 0       |
| OTU21 | Metazoa Annelida Terebellida Ampharetidae                                  | 0       | 0       | 0       | 0       | 0       | 0       | 0       | 0       | 2390.04 | 0       |
| OTU22 | Metazoa Annelida Phyllodocida Syllidae Exogone Exogone+naidina             | 0       | 0       | 0       | 0       | 0       | 0       | 0       | 0       | 0       | 0       |
| OTU23 | Metazoa Platyhelminthes                                                    | 0       | 0       | 0       | 0       | 0       | 443.59  | 8.12    | 238.09  | 25.4    | 292.63  |
| OTU24 | Metazoa Platyhelminthes                                                    | 0       | 0       | 0       | 0       | 0       | 0       | 0       | 0       | 0       | 0       |
| OTU25 | Metazoa Mollusca Bivalvia Heteroconchia Corbula                            | 0       | 0       | 0       | 0       | 0       | 0       | 0       | 0       | 0       | 0       |
| OTU26 | Metazoa Annelida Capitellida Capitellidae Heteromastus                     | 2.83    | 0       | 4.17    | 5.21    | 17.22   | 0       | 0       | 0       | 8.11    | 0       |

|       |                                                                               |       |       |        |      |        |        |       |        |       |        |
|-------|-------------------------------------------------------------------------------|-------|-------|--------|------|--------|--------|-------|--------|-------|--------|
| OTU27 | Metazoa Arthropoda Crustacea Maxillopoda Copepoda                             | 0     | 0     | 0      | 0    | 0      | 12.54  | 1.54  | 8.67   | 5.84  | 38.96  |
| OTU28 | Metazoa Nematoda                                                              | 0     | 0     | 0      | 0    | 3.69   | 0      | 0     | 0      | 0     | 0      |
| OTU29 | Metazoa Cnidaria Cnidaria_X Hydrozoa                                          | 0     | 0     | 0      | 0    | 0      | 967.11 | 0     | 0      | 0     | 0      |
| OTU30 | Metazoa Mollusca Gastropoda Heterobranchia Bulla                              | 0     | 0     | 0      | 0    | 0      | 544.66 | 0     | 0      | 0     | 0      |
| OTU31 | Metazoa Platyhelminthes                                                       | 0     | 0     | 0      | 0    | 0      | 116.67 | 2.69  | 32.21  | 21.49 | 0      |
| OTU32 | Metazoa Arthropoda Crustacea Ostracoda                                        | 0     | 0     | 26.54  | 0    | 0      | 0      | 0     | 0      | 0     | 0      |
| OTU33 | Metazoa Nemertea                                                              | 0     | 0     | 0      | 0    | 0      | 0      | 0     | 0      | 0     | 0      |
| OTU35 | Metazoa Nemertea                                                              | 0     | 0     | 0      | 0    | 0      | 0      | 0     | 39.37  | 0     | 0      |
| OTU36 | Metazoa Arthropoda Chelicerata                                                | 0     | 0     | 0      | 0    | 0      | 0      | 0     | 0      | 51.14 | 529.5  |
| OTU37 | Metazoa Annelida Phyllodocida Syllidae Erinaceusyllis Erinaceusyllis+cryptica | 0     | 2.22  | 0      | 0    | 420.16 | 0      | 0     | 0      | 0     | 7.79   |
| OTU38 | Metazoa Platyhelminthes                                                       | 49.78 | 0     | 0      | 0    | 0      | 0      | 0     | 0      | 0     | 0      |
| OTU39 | Metazoa Arthropoda Crustacea Maxillopoda Copepoda                             | 0     | 0     | 1.06   | 1.11 | 0      | 0      | 0     | 0      | 0     | 272.28 |
| OTU40 | Metazoa Annelida Capitellida Maldanidae Praxillella                           | 0     | 0     | 0      | 0    | 0      | 0      | 0     | 0      | 0     | 0      |
| OTU41 | Metazoa Arthropoda Crustacea Maxillopoda Copepoda                             | 0     | 0     | 0      | 0    | 0      | 0      | 0     | 0      | 0     | 0      |
| OTU42 | Metazoa Annelida Phyllodocida Syllidae Exogone Exogone+naidina                | 0     | 0     | 108.45 | 0    | 27.92  | 0      | 0     | 0      | 0     | 0      |
| OTU43 | Metazoa Hemichordata                                                          | 0     | 0     | 0      | 0    | 0      | 0      | 34.71 | 240.66 | 0     | 0      |
| OTU44 | Metazoa Cnidaria Cnidaria_X Hydrozoa                                          | 0     | 0     | 0      | 0    | 1.38   | 0      | 0     | 0      | 0     | 0      |
| OTU45 | Metazoa Mollusca Bivalvia Protobranchia Nucula                                | 0     | 0     | 0      | 0    | 0      | 26.03  | 0     | 0      | 0     | 0      |
| OTU46 | Metazoa Annelida Capitellida Capitellidae Capitella                           | 0     | 80.84 | 0      | 0    | 0      | 0      | 0     | 0      | 0     | 0      |
| OTU47 | Metazoa Platyhelminthes                                                       | 0     | 0     | 0      | 0    | 0      | 84.53  | 0     | 0      | 0     | 355.14 |
| OTU48 | Metazoa Platyhelminthes                                                       | 0     | 0     | 0      | 0    | 0      | 29.32  | 0     | 0      | 0     | 22.1   |
| OTU49 | Metazoa Platyhelminthes                                                       | 0     | 0     | 0      | 0    | 0      | 0      | 0     | 0      | 0     | 0      |
| OTU51 | Metazoa Nematoda                                                              | 0     | 0     | 3.13   | 2.15 | 0      | 0      | 0     | 0      | 0     | 0      |
| OTU52 | Metazoa Annelida Capitellida Maldanidae                                       | 0     | 0     | 0      | 0    | 0      | 0      | 0     | 0      | 0     | 145.3  |
| OTU53 | Metazoa Nematoda                                                              | 0     | 0     | 13.29  | 0    | 5.16   | 0      | 0     | 0      | 0     | 0      |
| OTU54 | Metazoa Annelida Oligochaeta Tubificidae                                      | 0     | 0     | 0      | 0    | 0      | 0      | 0     | 0      | 0     | 0      |
| OTU55 | Metazoa Platyhelminthes                                                       | 0     | 0     | 0      | 0    | 0      | 165.04 | 0     | 19.76  | 8.37  | 21.08  |
| OTU56 | Metazoa Platyhelminthes                                                       | 0     | 0     | 0      | 0    | 0      | 27.17  | 0     | 17.95  | 0     | 155.79 |
| OTU58 | Metazoa Nematoda                                                              | 0     | 0     | 0      | 0    | 1.29   | 0      | 0     | 0      | 0     | 21.52  |

|       |                                                                                |      |   |      |      |   |       |     |      |        |        |
|-------|--------------------------------------------------------------------------------|------|---|------|------|---|-------|-----|------|--------|--------|
| OTU59 | Metazoa Echinodermata Echinodermata_X Echinodermata_XX Amphiura                | 0    | 0 | 0    | 0    | 0 | 0     | 0   | 0    | 177.01 | 0      |
| OTU60 | Metazoa Platyhelminthes                                                        | 0    | 0 | 0    | 0    | 0 | 0     | 0   | 0    | 0      | 0      |
| OTU61 | Metazoa Cnidaria Cnidaria_X Hydrozoa                                           | 0    | 0 | 0    | 0    | 0 | 0     | 0   | 0    | 0      | 0      |
| OTU62 | Metazoa Platyhelminthes                                                        | 0    | 0 | 0    | 0    | 0 | 0     | 0   | 0    | 0      | 0      |
| OTU64 | Metazoa Arthropoda Crustacea Maxillopoda Copepoda                              | 0    | 0 | 0    | 0    | 0 | 0     | 0   | 0    | 0      | 0      |
| OTU65 | Metazoa Nematoda                                                               | 0    | 0 | 0    | 0    | 0 | 0     | 0   | 0    | 0      | 174.08 |
| OTU66 | Metazoa Arthropoda Crustacea Maxillopoda Copepoda                              | 0    | 0 | 0    | 0    | 0 | 14.6  | 1.2 | 1.54 | 4.25   | 0      |
| OTU68 | Metazoa Platyhelminthes                                                        | 0    | 0 | 0    | 0    | 0 | 0     | 0   | 0    | 0      | 0      |
| OTU69 | Metazoa Platyhelminthes                                                        | 0    | 0 | 0    | 0    | 0 | 0     | 0   | 0    | 0      | 0      |
| OTU70 | Metazoa Arthropoda Crustacea Maxillopoda Copepoda                              | 0    | 0 | 0    | 0    | 0 | 0     | 0   | 0    | 0      | 0      |
| OTU71 | Metazoa Platyhelminthes                                                        | 0    | 0 | 0    | 0    | 0 | 0     | 0   | 0    | 0      | 0      |
| OTU72 | Metazoa Nematoda                                                               | 0    | 0 | 0    | 0    | 0 | 0     | 0   | 0    | 0      | 0      |
| OTU73 | Metazoa Nematoda                                                               | 0    | 0 | 0    | 0    | 0 | 0     | 0   | 0    | 0      | 0      |
| OTU75 | Metazoa Gastrotricha                                                           | 0    | 0 | 0    | 0    | 0 | 5.88  | 0   | 0    | 0      | 11.78  |
| OTU76 | Metazoa Arthropoda Crustacea Maxillopoda Copepoda                              | 0    | 0 | 0    | 0    | 0 | 5.98  | 0   | 0    | 0      | 25.72  |
| OTU78 | Metazoa Mollusca Gastropoda Heterobranchia Calliopaea Calliopaea+bellula       | 0    | 0 | 1.52 | 0    | 0 | 0     | 0   | 0    | 0      | 0      |
| OTU79 | Metazoa Annelida Phyllodocida Syllidae                                         | 4.86 | 0 | 0    | 2.03 | 0 | 0     | 0   | 0    | 0      | 0      |
| OTU80 | Metazoa Echinodermata Echinodermata_X Echinodermata_XX Leptosynapta            | 0    | 0 | 0    | 0    | 0 | 0     | 0   | 71.1 | 0      | 0      |
| OTU82 | Metazoa Annelida Capitellida Capitellidae Capitella                            | 0    | 0 | 0    | 0    | 0 | 0     | 0   | 0    | 0      | 0      |
| OTU84 | Metazoa Annelida Capitellida Capitellidae Capitella                            | 0    | 0 | 0    | 0    | 0 | 0     | 0   | 9.32 | 0      | 0      |
| OTU85 | Metazoa Platyhelminthes                                                        | 0    | 0 | 0    | 0    | 0 | 0     | 0   | 0    | 0      | 0      |
| OTU86 | Metazoa Platyhelminthes                                                        | 0    | 0 | 0    | 0    | 0 | 0     | 0   | 0    | 0      | 0      |
| OTU87 | Metazoa Annelida Terebellida Terebellidae                                      | 0    | 0 | 0    | 0    | 0 | 0     | 0   | 0    | 0      | 0      |
| OTU88 | Metazoa Platyhelminthes                                                        | 0    | 0 | 0    | 0    | 0 | 0     | 0   | 0    | 0      | 0      |
| OTU89 | Metazoa Annelida Oligochaeta Tubificidae                                       | 0    | 0 | 0    | 0    | 0 | 0     | 0   | 0    | 0      | 0      |
| OTU90 | Metazoa Cnidaria Cnidaria_X Anthozoa Ceriantheopsis                            | 0    | 0 | 0    | 0    | 0 | 0     | 0   | 0    | 0      | 0      |
| OTU91 | Metazoa Annelida Capitellida Scalibregmatidae Scalibregma Scalibregma+inflatum | 0    | 0 | 0    | 0    | 0 | 0     | 0   | 0    | 0      | 0      |
| OTU92 | Metazoa Annelida Scolecida Opheliidae Ophelina                                 | 0    | 0 | 0    | 0    | 0 | 0     | 0   | 0    | 0      | 0      |
| OTU93 | Metazoa Gastrotricha                                                           | 0    | 0 | 0    | 0    | 0 | 21.23 | 0   | 0    | 0      | 24.52  |



|        |                                                                         |   |      |   |   |   |       |      |      |       |       |
|--------|-------------------------------------------------------------------------|---|------|---|---|---|-------|------|------|-------|-------|
| OTU125 | Metazoa Platyhelminthes                                                 | 0 | 0    | 0 | 0 | 0 | 0     | 0    | 0    | 0     | 0     |
| OTU126 | Metazoa Nematoda                                                        | 0 | 2.73 | 0 | 0 | 0 | 0     | 0    | 0    | 0     | 0     |
| OTU128 | Metazoa Kinorhyncha                                                     | 0 | 0    | 0 | 0 | 0 | 0     | 0    | 0    | 0     | 29.68 |
| OTU130 | Metazoa Annelida Phyllodocida Phyllodocidae                             | 0 | 0    | 0 | 0 | 0 | 0     | 1.01 | 0    | 0     | 0     |
| OTU131 | Metazoa Annelida Oligochaeta Tubificidae                                | 0 | 0    | 0 | 0 | 0 | 0     | 0    | 0    | 0     | 0     |
| OTU132 | Metazoa Nematoda                                                        | 0 | 0    | 0 | 0 | 0 | 0     | 0    | 0    | 0     | 0     |
| OTU134 | Metazoa Annelida Phyllodocida Syllidae                                  | 0 | 2.32 | 0 | 0 | 0 | 0     | 0    | 0    | 0     | 0     |
| OTU135 | Metazoa Annelida Capitellida Capitellidae Capitella                     | 0 | 0    | 0 | 0 | 0 | 0     | 0    | 0    | 0     | 0     |
| OTU136 | Metazoa Nematoda                                                        | 0 | 0    | 0 | 0 | 0 | 0     | 0    | 0    | 0     | 0     |
| OTU137 | Metazoa Hemichordata                                                    | 0 | 0    | 0 | 0 | 0 | 0     | 0    | 0    | 0     | 0     |
| OTU138 | Metazoa                                                                 | 0 | 0    | 0 | 0 | 0 | 39.08 | 0    | 0    | 0     | 0     |
| OTU141 | Metazoa Nematoda                                                        | 0 | 0    | 0 | 0 | 0 | 0     | 0    | 0    | 0     | 0     |
| OTU143 | Metazoa Annelida Capitellida Capitellidae Capitella                     | 0 | 0    | 0 | 0 | 0 | 0     | 0    | 0    | 0     | 0     |
| OTU144 | Metazoa Platyhelminthes                                                 | 0 | 0    | 0 | 0 | 0 | 0     | 0    | 4.18 | 0     | 0     |
| OTU145 | Metazoa Annelida Spionida Spionidae Malacoceros Malacoceros+fuliginosus | 0 | 0    | 0 | 0 | 0 | 0     | 0    | 0    | 0     | 0     |
| OTU146 | Metazoa Arthropoda Crustacea Maxillopoda Copepoda                       | 0 | 0    | 0 | 0 | 0 | 0     | 0    | 0    | 0     | 0     |
| OTU147 | Metazoa Porifera                                                        | 0 | 0    | 0 | 0 | 0 | 27.24 | 0    | 0    | 0     | 0     |
| OTU149 | Metazoa Mollusca Bivalvia Heteroconchia Macoma Macoma+nasuta            | 0 | 0    | 0 | 0 | 0 | 0     | 0    | 0    | 0     | 0     |
| OTU151 | Metazoa Nematoda                                                        | 0 | 0    | 0 | 0 | 0 | 0     | 0    | 0    | 0     | 0     |
| OTU152 | Metazoa Platyhelminthes                                                 | 0 | 0    | 0 | 0 | 0 | 0     | 0    | 0    | 0     | 0     |
| OTU153 | Metazoa Annelida Phyllodocida Phyllodocidae                             | 0 | 0    | 0 | 0 | 0 | 0     | 0    | 0    | 0     | 0     |
| OTU154 | Metazoa Annelida Spionida Cirratulidae                                  | 0 | 0    | 0 | 0 | 0 | 0     | 0    | 0    | 0     | 0     |
| OTU155 | Metazoa Annelida Spionida Cirratulidae                                  | 0 | 0    | 0 | 0 | 0 | 0     | 0    | 0    | 17.24 | 0     |
| OTU156 | Metazoa Arthropoda Crustacea Maxillopoda Copepoda                       | 0 | 0    | 0 | 0 | 0 | 0     | 0    | 0    | 0     | 0     |
| OTU157 | Metazoa Annelida Phyllodocida Phyllodocidae                             | 0 | 0    | 0 | 0 | 0 | 0     | 0    | 0    | 0     | 0     |
| OTU158 | Metazoa Annelida Phyllodocida Phyllodocidae                             | 0 | 0    | 0 | 0 | 0 | 0     | 3.26 | 0    | 0     | 0     |
| OTU159 | Metazoa Rotifera                                                        | 0 | 0    | 0 | 0 | 0 | 0     | 0    | 0    | 0     | 0     |
| OTU160 | Metazoa Arthropoda Crustacea Maxillopoda Copepoda                       | 0 | 0    | 0 | 0 | 0 | 0     | 0    | 0    | 0     | 0     |
| OTU161 | Metazoa Platyhelminthes                                                 | 0 | 0    | 0 | 0 | 0 | 0     | 0    | 3.26 | 0     | 0     |





## Supplementary Table 7. continued

| OTU   | assign                                                                     | DNA_8_1 | DNA_8_2 | DNA_8_3 | DNA_8_4 | DNA_8_5 | DNA_9_1 | DNA_9_2 | DNA_9_3 | DNA_9_4 | DNA_9_5 |
|-------|----------------------------------------------------------------------------|---------|---------|---------|---------|---------|---------|---------|---------|---------|---------|
| OTU1  | Metazoa Annelida Capitellida Capitellidae Capitella                        | 0       | 3.8     | 0       | 0       | 760.88  | 0       | 0       | 0       | 0       | 0       |
| OTU2  | Metazoa Annelida Oligochaeta Tubificidae                                   | 0       | 0       | 0       | 0       | 0       | 0       | 0       | 0       | 0       | 0       |
| OTU4  | Metazoa Annelida Phyllodocida Phyllodocidae Phyllodoce Phyllodoce+maculata | 0       | 12.39   | 0       | 3635.72 | 1696.01 | 0       | 0       | 0       | 0       | 0       |
| OTU5  | Metazoa Annelida Spionida Spionidae Malacoceros Malacoceros+fuliginosus    | 0       | 0       | 0       | 0       | 0       | 0       | 0       | 0       | 0       | 0       |
| OTU6  | Metazoa Annelida Spionida Cirratulidae                                     | 0       | 0       | 0       | 0       | 0       | 0       | 0       | 0       | 0       | 0       |
| OTU7  | Metazoa Platyhelminthes                                                    | 1190.77 | 0       | 1166.86 | 63.83   | 1324.94 | 0       | 0       | 1463.03 | 0       | 2540.07 |
| OTU8  | Metazoa Annelida Phyllodocida Syllidae Salvatoria                          | 0       | 0       | 16.29   | 0       | 36.66   | 609.39  | 22.83   | 178.81  | 0       | 188.6   |
| OTU9  | Metazoa Annelida                                                           | 2.22    | 3121.52 | 0       | 0       | 0       | 0       | 0       | 0       | 0       | 0       |
| OTU10 | Metazoa Nematoda                                                           | 0       | 0       | 0       | 0       | 0       | 0       | 0       | 0       | 0       | 0       |
| OTU11 | Metazoa Nematoda                                                           | 0       | 0       | 0       | 0       | 0       | 0       | 0       | 0       | 0       | 0       |
| OTU12 | Metazoa Nematoda                                                           | 0       | 0       | 0       | 0       | 0       | 0       | 0       | 0       | 0       | 0       |
| OTU13 | Metazoa Cnidaria Cnidaria_X Anthozoa                                       | 0       | 0       | 0       | 0       | 0       | 0       | 0       | 0       | 0       | 0       |
| OTU14 | Metazoa Nemertea                                                           | 0       | 0       | 0       | 227.91  | 0       | 0       | 0       | 0       | 0       | 0       |
| OTU15 | Metazoa Mollusca Bivalvia Heteroconchia Abra                               | 0       | 0       | 0       | 0       | 0       | 0       | 0       | 209.74  | 0       | 0       |
| OTU16 | Metazoa Platyhelminthes                                                    | 520.47  | 375.23  | 72.49   | 20.73   | 6.25    | 0       | 0       | 0       | 112.56  | 0       |
| OTU17 | Metazoa Cnidaria Cnidaria_X Hydrozoa                                       | 105     | 0       | 145.45  | 0       | 65.27   | 102.68  | 781.14  | 0       | 0       | 0       |
| OTU18 | Metazoa Platyhelminthes                                                    | 0       | 0       | 48.86   | 0       | 0       | 160.18  | 0       | 0       | 16.17   | 0       |
| OTU19 | Metazoa Arthropoda Crustacea Ostracoda                                     | 274.29  | 125.64  | 0       | 14.79   | 75.79   | 0       | 768.2   | 0       | 189.52  | 682.25  |
| OTU20 | Metazoa Nematoda                                                           | 0       | 0       | 0       | 0       | 0       | 0       | 0       | 0       | 0       | 0       |
| OTU21 | Metazoa Annelida Terebellida Ampharetidae                                  | 0       | 0       | 0       | 0       | 0       | 0       | 0       | 0       | 0       | 0       |
| OTU22 | Metazoa Annelida Phyllodocida Syllidae Exogone Exogone+naidina             | 0       | 0       | 0       | 0       | 0       | 0       | 0       | 0       | 0       | 0       |
| OTU23 | Metazoa Platyhelminthes                                                    | 462.73  | 0       | 229.87  | 5.14    | 5.01    | 0       | 522.9   | 897.08  | 373.18  | 114.57  |
| OTU24 | Metazoa Platyhelminthes                                                    | 0       | 0       | 0       | 0       | 0       | 0       | 0       | 0       | 0       | 0       |
| OTU25 | Metazoa Mollusca Bivalvia Heteroconchia Corbula                            | 0       | 0       | 0       | 0       | 0       | 0       | 0       | 0       | 0       | 0       |
| OTU26 | Metazoa Annelida Capitellida Capitellidae Heteromastus                     | 0       | 0       | 198.03  | 0       | 17.27   | 0       | 0       | 0       | 0       | 0       |
| OTU27 | Metazoa Arthropoda Crustacea Maxillopoda Copepoda                          | 287.7   | 0       | 115.16  | 16.02   | 11.99   | 101.96  | 53.07   | 134.63  | 218.12  | 78.5    |



|       |                                                                                |        |       |        |      |       |        |       |       |        |       |
|-------|--------------------------------------------------------------------------------|--------|-------|--------|------|-------|--------|-------|-------|--------|-------|
| OTU60 | Metazoa Platyhelminthes                                                        | 291.57 | 0     | 0      | 0    | 0     | 0      | 0     | 0     | 0      | 0     |
| OTU61 | Metazoa Cnidaria Cnidaria_X Hydrozoa                                           | 183.55 | 0     | 0      | 0    | 0     | 0      | 0     | 0     | 0      | 0     |
| OTU62 | Metazoa Platyhelminthes                                                        | 0      | 0     | 0      | 0    | 0     | 0      | 0     | 0     | 0      | 0     |
| OTU64 | Metazoa Arthropoda Crustacea Maxillopoda Copepoda                              | 0      | 0     | 0      | 0    | 0     | 0      | 0     | 0     | 0      | 0     |
| OTU65 | Metazoa Nematoda                                                               | 0      | 0     | 0      | 0    | 0     | 0      | 0     | 0     | 0      | 0     |
| OTU66 | Metazoa Arthropoda Crustacea Maxillopoda Copepoda                              | 56.45  | 0     | 48.66  | 2.1  | 1.5   | 106.53 | 55.93 | 0     | 0      | 0     |
| OTU68 | Metazoa Platyhelminthes                                                        | 0      | 0     | 24.55  | 3.02 | 0     | 0      | 0     | 0     | 0      | 0     |
| OTU69 | Metazoa Platyhelminthes                                                        | 0      | 0     | 0      | 0    | 0     | 0      | 0     | 0     | 0      | 0     |
| OTU70 | Metazoa Arthropoda Crustacea Maxillopoda Copepoda                              | 0      | 0     | 0      | 2.58 | 0     | 11.83  | 98.55 | 40.42 | 80.09  | 66.62 |
| OTU71 | Metazoa Platyhelminthes                                                        | 0      | 0     | 0      | 0    | 0     | 585.11 | 0     | 0     | 0      | 0     |
| OTU72 | Metazoa Nematoda                                                               | 0      | 0     | 0      | 0    | 0     | 0      | 0     | 0     | 0      | 0     |
| OTU73 | Metazoa Nematoda                                                               | 0      | 0     | 0      | 0    | 0     | 0      | 0     | 0     | 0      | 0     |
| OTU75 | Metazoa Gastrotricha                                                           | 11     | 0     | 0      | 0    | 0     | 54.54  | 0     | 19.36 | 15.98  | 11.73 |
| OTU76 | Metazoa Arthropoda Crustacea Maxillopoda Copepoda                              | 55.02  | 0     | 0      | 0    | 0     | 90.01  | 25.06 | 0     | 47.99  | 0     |
| OTU78 | Metazoa Mollusca Gastropoda Heterobranchia Calliopaea Calliopaea+bellula       | 0      | 0     | 0      | 0    | 0     | 0      | 0     | 0     | 0      | 0     |
| OTU79 | Metazoa Annelida Phyllodocida Syllidae                                         | 0      | 0     | 0      | 0    | 0     | 0      | 0     | 0     | 0      | 0     |
| OTU80 | Metazoa Echinodermata Echinodermata_X Echinodermata_XX Leptosynapta            | 0      | 0     | 0      | 0    | 0     | 0      | 0     | 0     | 0      | 0     |
| OTU82 | Metazoa Annelida Capitellida Capitellidae Capitella                            | 0      | 0     | 0      | 0    | 0     | 0      | 0     | 0     | 0      | 0     |
| OTU84 | Metazoa Annelida Capitellida Capitellidae Capitella                            | 47.21  | 69.88 | 0      | 0    | 0     | 0      | 0     | 0     | 0      | 0     |
| OTU85 | Metazoa Platyhelminthes                                                        | 0      | 0     | 0      | 3.59 | 19.94 | 0      | 0     | 0     | 0      | 0     |
| OTU86 | Metazoa Platyhelminthes                                                        | 0      | 0     | 0      | 0    | 0     | 0      | 0     | 0     | 0      | 0     |
| OTU87 | Metazoa Annelida Terebellida Terebellidae                                      | 0      | 0     | 0      | 0    | 0     | 0      | 0     | 0     | 0      | 0     |
| OTU88 | Metazoa Platyhelminthes                                                        | 0      | 0     | 0      | 0    | 0     | 0      | 0     | 0     | 0      | 0     |
| OTU89 | Metazoa Annelida Oligochaeta Tubificidae                                       | 0      | 0     | 0      | 0    | 0     | 0      | 0     | 0     | 0      | 0     |
| OTU90 | Metazoa Cnidaria Cnidaria_X Anthozoa Ceriantheopsis                            | 0      | 0     | 0      | 0    | 0     | 0      | 0     | 0     | 273.12 | 0     |
| OTU91 | Metazoa Annelida Capitellida Scalibregmatidae Scalibregma Scalibregma+inflatum | 0      | 0     | 0      | 0    | 0     | 0      | 12.89 | 0     | 0      | 0     |
| OTU92 | Metazoa Annelida Scolecida Opheliidae Ophelina                                 | 0      | 0     | 0      | 0    | 0     | 296.29 | 0     | 0     | 0      | 0     |
| OTU93 | Metazoa Gastrotricha                                                           | 29.27  | 0     | 0      | 0    | 0     | 0      | 0     | 0     | 0      | 7.61  |
| OTU94 | Metazoa Platyhelminthes                                                        | 0      | 0     | 320.31 | 0    | 0     | 0      | 0     | 0     | 0      | 0     |

|        |                                                                         |       |   |       |      |      |       |       |        |        |       |
|--------|-------------------------------------------------------------------------|-------|---|-------|------|------|-------|-------|--------|--------|-------|
| OTU95  | Metazoa Arthropoda Crustacea Ostracoda                                  | 0     | 0 | 0     | 0    | 0    | 18.19 | 0     | 173.72 | 0      | 0     |
| OTU96  | Metazoa Platyhelminthes                                                 | 0     | 0 | 0     | 0    | 0    | 42.81 | 0     | 0      | 0      | 0     |
| OTU97  | Metazoa Platyhelminthes                                                 | 0     | 0 | 0     | 0    | 0    | 0     | 0     | 208.57 | 0      | 0     |
| OTU98  | Metazoa Platyhelminthes                                                 | 0     | 0 | 0     | 0    | 0    | 0     | 0     | 0      | 0      | 0     |
| OTU99  | Metazoa Platyhelminthes                                                 | 0     | 0 | 0     | 0    | 0    | 0     | 0     | 0      | 148.64 | 0     |
| OTU100 | Metazoa Arthropoda Crustacea Ostracoda                                  | 0     | 0 | 0     | 2.29 | 0    | 0     | 0     | 0      | 0      | 0     |
| OTU101 | Metazoa Annelida Phyllodocida Phyllodocidae                             | 0     | 0 | 0     | 0    | 0    | 0     | 0     | 0      | 0      | 0     |
| OTU102 | Metazoa Arthropoda Crustacea Maxillopoda Copepoda                       | 0     | 0 | 0     | 1.9  | 0    | 41.4  | 18.03 | 19.27  | 0      | 20.36 |
| OTU103 | Metazoa Nemertea                                                        | 0     | 0 | 0     | 2.51 | 0    | 0     | 0     | 0      | 0      | 0     |
| OTU104 | Metazoa Annelida Phyllodocida Syllidae                                  | 0     | 0 | 0     | 0    | 0    | 48.19 | 0     | 0      | 0      | 0     |
| OTU107 | Metazoa Arthropoda Crustacea Ostracoda                                  | 0     | 0 | 16.35 | 0    | 0    | 30.55 | 26.83 | 0      | 69.41  | 0     |
| OTU108 | Metazoa Annelida Spionida Spionidae Malacoceros Malacoceros+fuliginosus | 0     | 0 | 0     | 0    | 0    | 0     | 0     | 0      | 0      | 0     |
| OTU109 | Metazoa Arthropoda Crustacea Maxillopoda Copepoda                       | 0     | 0 | 0     | 0    | 0    | 0     | 0     | 0      | 0      | 0     |
| OTU110 | Metazoa Arthropoda Crustacea Maxillopoda Copepoda                       | 0     | 0 | 0     | 0    | 0    | 0     | 0     | 0      | 21.09  | 0     |
| OTU111 | Metazoa Kinorhyncha                                                     | 28.92 | 0 | 0     | 0    | 0    | 11.97 | 0     | 62.85  | 10.58  | 0     |
| OTU112 | Metazoa Platyhelminthes                                                 | 0     | 0 | 49.28 | 0    | 0    | 0     | 0     | 89.49  | 0      | 0     |
| OTU113 | Metazoa Nematoda                                                        | 8.67  | 0 | 0     | 0    | 0    | 0     | 0     | 0      | 0      | 0     |
| OTU114 | Metazoa Nematoda                                                        | 0     | 0 | 0     | 0    | 0    | 0     | 0     | 0      | 0      | 0     |
| OTU115 | Metazoa                                                                 | 0     | 0 | 0     | 0    | 0    | 0     | 0     | 0      | 0      | 0     |
| OTU116 | Metazoa Platyhelminthes                                                 | 0     | 0 | 0     | 0    | 0    | 140.3 | 0     | 0      | 0      | 0     |
| OTU117 | Metazoa Nematoda                                                        | 0     | 0 | 0     | 0    | 0    | 0     | 9.59  | 0      | 0      | 0     |
| OTU118 | Metazoa Arthropoda Crustacea Maxillopoda Copepoda                       | 0     | 0 | 0     | 0    | 0    | 0     | 0     | 0      | 0      | 0     |
| OTU119 | Metazoa Nematoda                                                        | 0     | 0 | 0     | 0    | 0    | 0     | 0     | 0      | 0      | 0     |
| OTU120 | Metazoa Platyhelminthes                                                 | 0     | 0 | 0     | 0    | 0    | 0     | 0     | 0      | 0      | 47.5  |
| OTU121 | Metazoa Nematoda                                                        | 0     | 0 | 0     | 1.02 | 0    | 0     | 0     | 0      | 0      | 0     |
| OTU122 | Metazoa Annelida Oligochaeta Tubificidae                                | 0     | 0 | 0     | 0    | 0    | 0     | 0     | 0      | 0      | 0     |
| OTU123 | Metazoa Mollusca Bivalvia Heteroconchia Myrtea Myrtea+spinifera         | 0     | 0 | 0     | 2.75 | 0    | 0     | 0     | 0      | 0      | 0     |
| OTU124 | Metazoa Annelida Terebellida Pectinariidae Pectinaria                   | 0     | 0 | 0     | 0    | 0    | 0     | 0     | 0      | 0      | 55.44 |
| OTU125 | Metazoa Platyhelminthes                                                 | 0     | 0 | 0     | 0    | 1.52 | 0     | 0     | 0      | 0      | 59.95 |











|       |                                                                                |       |        |       |       |        |      |   |   |      |   |
|-------|--------------------------------------------------------------------------------|-------|--------|-------|-------|--------|------|---|---|------|---|
| OTU59 | Metazoa Echinodermata Echinodermata_X Echinodermata_XX Amphiura                | 0     | 0      | 0     | 0     | 0      | 0    | 0 | 0 | 0    | 0 |
| OTU60 | Metazoa Platyhelminthes                                                        | 0     | 0      | 0     | 0     | 0      | 0    | 0 | 0 | 0    | 0 |
| OTU61 | Metazoa Cnidaria Cnidaria_X Hydrozoa                                           | 0     | 0      | 0     | 0     | 123.38 | 0    | 0 | 0 | 0    | 0 |
| OTU62 | Metazoa Platyhelminthes                                                        | 0     | 0      | 0     | 0     | 0      | 21.3 | 0 | 0 | 9.29 | 0 |
| OTU64 | Metazoa Arthropoda Crustacea Maxillopoda Copepoda                              | 0     | 0      | 0     | 0     | 0      | 0    | 0 | 0 | 0    | 0 |
| OTU65 | Metazoa Nematoda                                                               | 0     | 0      | 0     | 0     | 115.91 | 0    | 0 | 0 | 0    | 0 |
| OTU66 | Metazoa Arthropoda Crustacea Maxillopoda Copepoda                              | 0     | 0      | 0     | 0     | 0      | 0    | 0 | 0 | 0    | 0 |
| OTU68 | Metazoa Platyhelminthes                                                        | 0     | 126.26 | 0     | 0     | 0      | 0    | 0 | 0 | 0    | 0 |
| OTU69 | Metazoa Platyhelminthes                                                        | 0     | 0      | 0     | 0     | 0      | 0    | 0 | 0 | 0    | 0 |
| OTU70 | Metazoa Arthropoda Crustacea Maxillopoda Copepoda                              | 0     | 0      | 0     | 0     | 0      | 0    | 0 | 0 | 0    | 0 |
| OTU71 | Metazoa Platyhelminthes                                                        | 0     | 0      | 0     | 0     | 0      | 0    | 0 | 0 | 0    | 0 |
| OTU72 | Metazoa Nematoda                                                               | 0     | 0      | 0     | 0     | 0      | 0    | 0 | 0 | 0    | 0 |
| OTU73 | Metazoa Nematoda                                                               | 0     | 0      | 0     | 0     | 0      | 0    | 0 | 0 | 0    | 0 |
| OTU75 | Metazoa Gastrotricha                                                           | 19.28 | 4.15   | 62.25 | 30.31 | 12.03  | 0    | 0 | 0 | 0    | 0 |
| OTU76 | Metazoa Arthropoda Crustacea Maxillopoda Copepoda                              | 0     | 0      | 0     | 0     | 0      | 0    | 0 | 0 | 0    | 0 |
| OTU78 | Metazoa Mollusca Gastropoda Heterobranchia Calliopaea Calliopaea+bellula       | 0     | 0      | 0     | 0     | 0      | 0    | 0 | 0 | 0    | 0 |
| OTU79 | Metazoa Annelida Phyllodocida Syllidae                                         | 0     | 0      | 0     | 0     | 0      | 0    | 0 | 0 | 0    | 0 |
| OTU80 | Metazoa Echinodermata Echinodermata_X Echinodermata_XX Leptosynapta            | 0     | 0      | 0     | 0     | 0      | 0    | 0 | 0 | 0    | 0 |
| OTU82 | Metazoa Annelida Capitellida Capitellidae Capitella                            | 0     | 0      | 0     | 0     | 0      | 0    | 0 | 0 | 0    | 0 |
| OTU84 | Metazoa Annelida Capitellida Capitellidae Capitella                            | 0     | 0      | 0     | 0     | 0      | 0    | 0 | 0 | 0    | 0 |
| OTU85 | Metazoa Platyhelminthes                                                        | 0     | 0      | 0     | 0     | 0      | 0    | 0 | 0 | 0    | 0 |
| OTU86 | Metazoa Platyhelminthes                                                        | 0     | 0      | 0     | 0     | 0      | 0    | 0 | 0 | 0    | 0 |
| OTU87 | Metazoa Annelida Terebellida Terebellidae                                      | 0     | 0      | 0     | 0     | 0      | 0    | 0 | 0 | 0    | 0 |
| OTU88 | Metazoa Platyhelminthes                                                        | 0     | 0      | 0     | 0     | 0      | 0    | 0 | 0 | 0    | 0 |
| OTU89 | Metazoa Annelida Oligochaeta Tubificidae                                       | 0     | 0      | 0     | 0     | 0      | 0    | 0 | 0 | 0    | 0 |
| OTU90 | Metazoa Cnidaria Cnidaria_X Anthozoa Ceriantheopsis                            | 0     | 0      | 0     | 0     | 0      | 0    | 0 | 0 | 0    | 0 |
| OTU91 | Metazoa Annelida Capitellida Scalibregmatidae Scalibregma Scalibregma+inflatum | 0     | 68.74  | 0     | 0     | 0      | 0    | 0 | 0 | 0    | 0 |
| OTU92 | Metazoa Annelida Scolecida Opheliidae Ophelina                                 | 0     | 0      | 0     | 0     | 0      | 0    | 0 | 0 | 0    | 0 |
| OTU93 | Metazoa Gastrotricha                                                           | 0     | 10.69  | 84.04 | 0     | 0      | 0    | 0 | 0 | 0    | 0 |







## Supplementary Table 7. continued

| OTU   | assign                                                                     | DNA_2_1 | DNA_2_2 | DNA_2_3 | DNA_2_4 | DNA_2_5 | DNA_3_1 | DNA_3_2 | DNA_3_3 | DNA_3_4 | DNA_3_5 |
|-------|----------------------------------------------------------------------------|---------|---------|---------|---------|---------|---------|---------|---------|---------|---------|
| OTU1  | Metazoa Annelida Capitellida Capitellidae Capitella                        | 495.55  | 2481.66 | 3402.09 | 13.12   | 225.38  | 520.1   | 1145.55 | 3276.99 | 297.58  | 1451.73 |
| OTU2  | Metazoa Annelida Oligochaeta Tubificidae                                   | 428.87  | 1.09    | 47.74   | 18.3    | 1484.44 | 2669.49 | 1945.84 | 197.89  | 2296.95 | 2205.65 |
| OTU4  | Metazoa Annelida Phyllodocida Phyllodocidae Phyllodoce Phyllococe+maculata | 752.49  | 138.57  | 54.94   | 12.97   | 0       | 264.1   | 171.32  | 213.1   | 242.6   | 135.97  |
| OTU5  | Metazoa Annelida Spionida Spionidae Malacoceros Malacoceros+fuliginosus    | 1938.62 | 458.31  | 0       | 4002.04 | 1003.96 | 0       | 0       | 11.7    | 2.65    | 6.25    |
| OTU6  | Metazoa Annelida Spionida Cirratulidae                                     | 0       | 0       | 0       | 0       | 0       | 0       | 0       | 348.69  | 752.02  | 33.03   |
| OTU7  | Metazoa Platyhelminthes                                                    | 269.62  | 290.07  | 264.22  | 17.31   | 547.29  | 0       | 244.18  | 9.72    | 98.95   | 177.83  |
| OTU8  | Metazoa Annelida Phyllodocida Syllidae Salvatoria                          | 0       | 0       | 0       | 0       | 73.5    | 0       | 0       | 0       | 169.28  | 0       |
| OTU9  | Metazoa Annelida                                                           | 0       | 38.25   | 220.21  | 35.56   | 0       | 0       | 0       | 0       | 0       | 13.97   |
| OTU10 | Metazoa Nematoda                                                           | 18.69   | 200.46  | 0       | 0       | 238.38  | 0       | 0       | 0       | 0       | 0       |
| OTU11 | Metazoa Nematoda                                                           | 0       | 3.06    | 0       | 0       | 10.33   | 16.24   | 63.42   | 26.64   | 9.77    | 9.32    |
| OTU12 | Metazoa Nematoda                                                           | 5.49    | 0       | 1.46    | 1.46    | 10.26   | 209.86  | 226.51  | 1.83    | 53.69   | 4       |
| OTU13 | Metazoa Cnidaria Cnidaria_X Anthozoa                                       | 0       | 0       | 101.47  | 0       | 0       | 111.85  | 0       | 2.5     | 0       | 0       |
| OTU14 | Metazoa Nemertea                                                           | 0       | 0       | 0       | 0       | 0       | 0       | 0       | 0       | 0       | 0       |
| OTU15 | Metazoa Mollusca Bivalvia Heteroconchia Abra                               | 0       | 0       | 0       | 0       | 0       | 0       | 0       | 0       | 0       | 42.85   |
| OTU16 | Metazoa Platyhelminthes                                                    | 0       | 0       | 0       | 0       | 0       | 0       | 0       | 0       | 0       | 0       |
| OTU17 | Metazoa Cnidaria Cnidaria_X Hydrozoa                                       | 0       | 0       | 0       | 0       | 0       | 0       | 0       | 0       | 0       | 0       |
| OTU18 | Metazoa Platyhelminthes                                                    | 0       | 64.2    | 0       | 0       | 0       | 0       | 11.43   | 0       | 0       | 3.44    |
| OTU19 | Metazoa Arthropoda Crustacea Ostracoda                                     | 0       | 0       | 0       | 0       | 0       | 0       | 0       | 0       | 0       | 0       |
| OTU20 | Metazoa Nematoda                                                           | 2.01    | 0       | 0       | 0       | 2.59    | 55.56   | 86.34   | 2.4     | 70.03   | 2.53    |
| OTU21 | Metazoa Annelida Terebellida Ampharetidae                                  | 0       | 0       | 0       | 0       | 0       | 0       | 0       | 0       | 0       | 0       |
| OTU22 | Metazoa Annelida Phyllodocida Syllidae Exogone Exogone+naidina             | 0       | 409.99  | 0       | 0       | 0       | 0       | 0       | 0       | 0       | 0       |
| OTU23 | Metazoa Platyhelminthes                                                    | 0       | 0       | 0       | 0       | 0       | 0       | 0       | 0       | 0       | 0       |
| OTU24 | Metazoa Platyhelminthes                                                    | 158.87  | 0       | 0       | 0       | 469.99  | 0       | 0       | 0       | 0       | 0       |
| OTU25 | Metazoa Mollusca Bivalvia Heteroconchia Corbula                            | 0       | 1.57    | 0       | 0       | 0       | 0       | 0       | 0       | 0       | 0       |
| OTU26 | Metazoa Annelida Capitellida Capitellidae Heteromastus                     | 0       | 0       | 0       | 0       | 0       | 0       | 17.37   | 0       | 0       | 0       |













**Supplementary Table 7. continued**

| OTU   | assign                                                                     | DNA_4_1 | DNA_4_2 | DNA_4_3 | DNA_4_4 | DNA_4_5 | DNA_5_1 | DNA_5_2 | DNA_5_3 | DNA_5_4 | DNA_5_5 |
|-------|----------------------------------------------------------------------------|---------|---------|---------|---------|---------|---------|---------|---------|---------|---------|
| OTU1  | Metazoa Annelida Capitellida Capitellidae Capitella                        | 3076.96 | 8.96    | 158.65  | 0       | 0       | 849.16  | 19.83   | 3504.61 | 0       | 0       |
| OTU2  | Metazoa Annelida Oligochaeta Tubificidae                                   | 458.41  | 2179.98 | 3458.96 | 3002.85 | 1451.4  | 0       | 780.64  | 119.93  | 3600.58 | 1816.97 |
| OTU4  | Metazoa Annelida Phyllodocida Phyllodocidae Phyllodoce Phyllodoce+maculata | 42.77   | 65.91   | 49.06   | 44.86   | 0       | 46.52   | 0       | 82.68   | 110.22  | 1633.71 |
| OTU5  | Metazoa Annelida Spionida Spionidae Malacoceros Malacoceros+fuliginosus    | 0       | 0       | 0       | 0       | 0       | 0       | 0       | 0       | 0       | 0       |
| OTU6  | Metazoa Annelida Spionida Cirratulidae                                     | 383.25  | 1628.9  | 365.28  | 774.17  | 779.47  | 2002.82 | 908.39  | 162.15  | 79.67   | 0       |
| OTU7  | Metazoa Platyhelminthes                                                    | 22.58   | 50.26   | 0       | 39.77   | 0       | 0       | 52.63   | 0       | 40.6    | 98.78   |
| OTU8  | Metazoa Annelida Phyllodocida Syllidae Salvatoria                          | 0       | 0       | 0       | 0       | 0       | 0       | 1038.32 | 0       | 0       | 0       |
| OTU9  | Metazoa Annelida                                                           | 0       | 0       | 0       | 0       | 0       | 0       | 223.55  | 0       | 0       | 0       |
| OTU10 | Metazoa Nematoda                                                           | 0       | 0       | 0       | 0       | 1694.89 | 0       | 0       | 0       | 0       | 106.5   |
| OTU11 | Metazoa Nematoda                                                           | 6.37    | 73.13   | 0       | 0       | 0       | 939.89  | 915.86  | 134.33  | 134.87  | 357.67  |
| OTU12 | Metazoa Nematoda                                                           | 58.95   | 73.32   | 32.98   | 168.06  | 77.9    | 47.26   | 34.05   | 10.36   | 7.66    | 33.63   |
| OTU13 | Metazoa Cnidaria Cnidaria_X Anthozoa                                       | 0       | 0       | 0       | 0       | 0       | 0       | 0       | 0       | 0       | 0       |
| OTU14 | Metazoa Nemertea                                                           | 0       | 0       | 0       | 0       | 0       | 0       | 0       | 0       | 0       | 0       |
| OTU15 | Metazoa Mollusca Bivalvia Heteroconchia Abra                               | 0       | 0       | 0       | 0       | 0       | 0       | 0       | 0       | 0       | 0       |
| OTU16 | Metazoa Platyhelminthes                                                    | 0       | 0       | 0       | 0       | 0       | 0       | 0       | 0       | 0       | 0       |
| OTU17 | Metazoa Cnidaria Cnidaria_X Hydrozoa                                       | 1.6     | 0       | 0       | 0       | 0       | 10.83   | 0       | 0       | 0       | 8.93    |
| OTU18 | Metazoa Platyhelminthes                                                    | 0       | 0       | 0       | 0       | 1.36    | 12.46   | 3.17    | 0       | 0       | 0       |
| OTU19 | Metazoa Arthropoda Crustacea Ostracoda                                     | 0       | 0       | 7.31    | 0       | 0       | 0       | 10.32   | 0       | 0       | 0       |
| OTU20 | Metazoa Nematoda                                                           | 13.04   | 8.14    | 29.76   | 22.08   | 6.52    | 107.53  | 73.4    | 75.9    | 34.23   | 42.58   |
| OTU21 | Metazoa Annelida Terebellida Ampharetidae                                  | 0       | 0       | 0       | 0       | 0       | 0       | 0       | 0       | 0       | 0       |
| OTU22 | Metazoa Annelida Phyllodocida Syllidae Exogone Exogone+naidina             | 0       | 0       | 0       | 0       | 0       | 0       | 0       | 0       | 0       | 0       |
| OTU23 | Metazoa Platyhelminthes                                                    | 0       | 0       | 0       | 0       | 0       | 0       | 0       | 0       | 0       | 0       |
| OTU24 | Metazoa Platyhelminthes                                                    | 0       | 0       | 0       | 0       | 0       | 0       | 0       | 0       | 94.17   | 0       |
| OTU25 | Metazoa Mollusca Bivalvia Heteroconchia Corbula                            | 0       | 0       | 0       | 0       | 0       | 0       | 0       | 0       | 0       | 0       |
| OTU26 | Metazoa Annelida Capitellida Capitellidae Heteromastus                     | 2.74    | 0       | 0       | 0       | 2.42    | 11.02   | 0       | 0       | 0       | 0       |

|       |                                                                                         |      |      |   |       |      |       |       |      |   |      |
|-------|-----------------------------------------------------------------------------------------|------|------|---|-------|------|-------|-------|------|---|------|
| OTU27 | Metazoa   Arthropoda   Crustacea   Maxillopoda   Copepoda                               | 0    | 0    | 0 | 0     | 0    | 0     | 0     | 0    | 0 | 0    |
| OTU28 | Metazoa   Nematoda                                                                      | 2.24 | 6.24 | 0 | 15.25 | 1.58 | 71.28 | 19.89 | 3.24 | 0 | 0    |
| OTU29 | Metazoa   Cnidaria   Cnidaria_X   Hydrozoa                                              | 0    | 0    | 0 | 0     | 0    | 0     | 0     | 0    | 0 | 0    |
| OTU30 | Metazoa   Mollusca   Gastropoda   Heterobranchia   Bulla                                | 0    | 0    | 0 | 0     | 65.1 | 0     | 2.67  | 0    | 0 | 0    |
| OTU31 | Metazoa   Platyhelminthes                                                               | 0    | 0    | 0 | 0     | 0    | 0     | 0     | 0    | 0 | 0    |
| OTU32 | Metazoa   Arthropoda   Crustacea   Ostracoda                                            | 0    | 0    | 0 | 0     | 0    | 0     | 0     | 0    | 0 | 0    |
| OTU33 | Metazoa   Nemertea                                                                      | 0    | 0    | 0 | 0     | 0    | 0     | 0     | 0    | 0 | 0    |
| OTU35 | Metazoa   Nemertea                                                                      | 0    | 0    | 0 | 0     | 0    | 0     | 0     | 0    | 0 | 0    |
| OTU36 | Metazoa   Arthropoda   Chelicerata                                                      | 4.13 | 0    | 0 | 0     | 0    | 0     | 1.79  | 0    | 0 | 0    |
| OTU37 | Metazoa   Annelida   Phyllodocida   Syllidae   Erinaceusyllis   Erinaceusyllis+cryptica | 0    | 0    | 0 | 0     | 0    | 0     | 0     | 0    | 0 | 0    |
| OTU38 | Metazoa   Platyhelminthes                                                               | 0    | 0    | 0 | 0     | 0    | 0     | 0     | 0    | 0 | 0    |
| OTU39 | Metazoa   Arthropoda   Crustacea   Maxillopoda   Copepoda                               | 0    | 0    | 0 | 0     | 0    | 0     | 0     | 0    | 0 | 0    |
| OTU40 | Metazoa   Annelida   Capitellida   Maldanidae   Praxillella                             | 0    | 0    | 0 | 0     | 0    | 0     | 0     | 0    | 0 | 0    |
| OTU41 | Metazoa   Arthropoda   Crustacea   Maxillopoda   Copepoda                               | 0    | 0    | 0 | 0     | 0    | 0     | 0     | 0    | 0 | 0    |
| OTU42 | Metazoa   Annelida   Phyllodocida   Syllidae   Exogone   Exogone+naidina                | 0    | 0    | 0 | 0     | 0    | 0     | 0     | 0    | 0 | 0    |
| OTU43 | Metazoa   Hemichordata                                                                  | 0    | 0    | 0 | 0     | 0    | 0     | 0     | 0    | 0 | 0    |
| OTU44 | Metazoa   Cnidaria   Cnidaria_X   Hydrozoa                                              | 0    | 0    | 0 | 0     | 0    | 0     | 0     | 0    | 0 | 0    |
| OTU45 | Metazoa   Mollusca   Bivalvia   Protobranchia   Nucula                                  | 0    | 0    | 0 | 0     | 0    | 0     | 0     | 0    | 0 | 0    |
| OTU46 | Metazoa   Annelida   Capitellida   Capitellidae   Capitella                             | 0    | 0    | 0 | 0     | 0    | 0     | 0     | 0    | 0 | 0    |
| OTU47 | Metazoa   Platyhelminthes                                                               | 0    | 0    | 0 | 0     | 0    | 0     | 0     | 0    | 0 | 0    |
| OTU48 | Metazoa   Platyhelminthes                                                               | 0    | 0    | 0 | 0     | 0    | 0     | 0     | 0    | 0 | 0    |
| OTU49 | Metazoa   Platyhelminthes                                                               | 0    | 0    | 0 | 0     | 0    | 0     | 0     | 0    | 0 | 0    |
| OTU51 | Metazoa   Nematoda                                                                      | 0    | 0    | 0 | 0     | 0    | 0     | 0     | 0    | 0 | 3.23 |
| OTU52 | Metazoa   Annelida   Capitellida   Maldanidae                                           | 0    | 0    | 0 | 0     | 0    | 0     | 0     | 0    | 0 | 0    |
| OTU53 | Metazoa   Nematoda                                                                      | 0    | 0    | 0 | 0     | 0    | 0     | 0     | 0    | 0 | 0    |
| OTU54 | Metazoa   Annelida   Oligochaeta   Tubificidae                                          | 2.01 | 1.95 | 0 | 0     | 0    | 0     | 1.06  | 0    | 0 | 0    |
| OTU55 | Metazoa   Platyhelminthes                                                               | 0    | 0    | 0 | 0     | 0    | 0     | 0     | 0    | 0 | 0    |
| OTU56 | Metazoa   Platyhelminthes                                                               | 0    | 0    | 0 | 0     | 0    | 0     | 0     | 0    | 0 | 0    |
| OTU58 | Metazoa   Nematoda                                                                      | 3.7  | 0    | 0 | 6.19  | 3.22 | 0     | 3.5   | 0    | 0 | 0    |







|        |                                                             |   |   |   |      |   |   |      |   |   |   |
|--------|-------------------------------------------------------------|---|---|---|------|---|---|------|---|---|---|
| OTU162 | Metazoa   Annelida   Capitellida   Capitellidae   Capitella | 0 | 0 | 0 | 0    | 0 | 0 | 0    | 0 | 0 | 0 |
| OTU163 | Metazoa   Nematoda                                          | 0 | 0 | 0 | 0    | 0 | 0 | 0    | 0 | 0 | 0 |
| OTU164 | Metazoa   Nematoda                                          | 0 | 0 | 0 | 0    | 0 | 0 | 0    | 0 | 0 | 0 |
| OTU165 | Metazoa   Nematoda                                          | 0 | 0 | 0 | 0    | 0 | 0 | 0    | 0 | 0 | 0 |
| OTU167 | Metazoa   Nematoda                                          | 0 | 0 | 0 | 0    | 0 | 0 | 0    | 0 | 0 | 0 |
| OTU168 | Metazoa   Cnidaria   Cnidaria_X   Hydrozoa                  | 0 | 0 | 0 | 0    | 0 | 0 | 0    | 0 | 0 | 0 |
| OTU169 | Metazoa   Arthropoda   Crustacea   Maxillopoda   Copepoda   | 0 | 0 | 0 | 0    | 0 | 0 | 0    | 0 | 0 | 0 |
| OTU170 | Metazoa   Gastrotricha                                      | 0 | 0 | 0 | 0    | 0 | 0 | 0    | 0 | 0 | 0 |
| OTU171 | Metazoa   Annelida   Phyllodocida   Syllidae                | 0 | 0 | 0 | 0    | 0 | 0 | 0    | 0 | 0 | 0 |
| OTU173 | Metazoa   Nematoda                                          | 0 | 0 | 0 | 0    | 0 | 0 | 0    | 0 | 0 | 0 |
| OTU174 | Metazoa   Arthropoda   Crustacea   Maxillopoda   Copepoda   | 0 | 0 | 0 | 0    | 0 | 0 | 0    | 0 | 0 | 0 |
| OTU175 | Metazoa   Arthropoda   Crustacea   Maxillopoda   Copepoda   | 0 | 0 | 0 | 0    | 0 | 0 | 0    | 0 | 0 | 0 |
| OTU176 | Metazoa   Platyhelminthes                                   | 0 | 0 | 0 | 0    | 0 | 0 | 0    | 0 | 0 | 0 |
| OTU178 | Metazoa   Nematoda                                          | 0 | 0 | 0 | 3.08 | 0 | 0 | 0    | 0 | 0 | 0 |
| OTU180 | Metazoa   Nematoda                                          | 0 | 0 | 0 | 0    | 0 | 0 | 0    | 0 | 0 | 0 |
| OTU183 | Metazoa   Annelida   Oligochaeta   Tubificidae              | 0 | 0 | 0 | 0    | 0 | 0 | 0    | 0 | 0 | 0 |
| OTU184 | Metazoa   Nematoda                                          | 0 | 0 | 0 | 0    | 0 | 0 | 0    | 0 | 0 | 0 |
| OTU186 | Metazoa   Platyhelminthes                                   | 0 | 0 | 0 | 0    | 0 | 0 | 0    | 0 | 0 | 0 |
| OTU188 | Metazoa   Annelida   Terebellida   Ampharetidae             | 0 | 0 | 0 | 0    | 0 | 0 | 0    | 0 | 0 | 0 |
| OTU190 | Metazoa   Annelida   Terebellida   Terebellidae             | 0 | 0 | 0 | 0    | 0 | 0 | 0    | 0 | 0 | 0 |
| OTU191 | Metazoa   Annelida   Phyllodocida   Syllidae                | 0 | 0 | 0 | 0    | 0 | 0 | 0    | 0 | 0 | 0 |
| OTU192 | Metazoa   Annelida   Spionida   Cirratulidae                | 0 | 0 | 0 | 0    | 0 | 0 | 2.42 | 0 | 0 | 0 |







|       |                                                                                |       |       |      |   |      |        |       |       |        |   |
|-------|--------------------------------------------------------------------------------|-------|-------|------|---|------|--------|-------|-------|--------|---|
| OTU59 | Metazoa Echinodermata Echinodermata_X Echinodermata_XX Amphiura                | 0     | 0     | 0    | 0 | 0    | 0      | 0     | 0     | 420.52 | 0 |
| OTU60 | Metazoa Platyhelminthes                                                        | 0     | 0     | 0    | 0 | 0    | 0      | 0     | 0     | 0      | 0 |
| OTU61 | Metazoa Cnidaria Cnidaria_X Hydrozoa                                           | 0     | 0     | 0    | 0 | 0    | 0      | 0     | 0     | 8.49   | 0 |
| OTU62 | Metazoa Platyhelminthes                                                        | 0     | 0     | 0    | 0 | 0    | 0      | 0     | 0     | 0      | 0 |
| OTU64 | Metazoa Arthropoda Crustacea Maxillopoda Copepoda                              | 0     | 0     | 0    | 0 | 0    | 0      | 0     | 0     | 0      | 0 |
| OTU65 | Metazoa Nematoda                                                               | 0     | 0     | 0    | 0 | 0    | 0      | 0     | 0     | 0      | 0 |
| OTU66 | Metazoa Arthropoda Crustacea Maxillopoda Copepoda                              | 0     | 0     | 0    | 0 | 0    | 0      | 0     | 0     | 0      | 0 |
| OTU68 | Metazoa Platyhelminthes                                                        | 0     | 0     | 0    | 0 | 0    | 0      | 30.65 | 0     | 0      | 0 |
| OTU69 | Metazoa Platyhelminthes                                                        | 84.96 | 0     | 0    | 0 | 0    | 0      | 0     | 0     | 0      | 0 |
| OTU70 | Metazoa Arthropoda Crustacea Maxillopoda Copepoda                              | 0     | 0     | 0    | 0 | 0    | 0      | 0     | 0     | 0      | 0 |
| OTU71 | Metazoa Platyhelminthes                                                        | 0     | 0     | 0    | 0 | 0    | 0      | 0     | 0     | 0      | 0 |
| OTU72 | Metazoa Nematoda                                                               | 0     | 0     | 0    | 0 | 0    | 0      | 0     | 0     | 0      | 0 |
| OTU73 | Metazoa Nematoda                                                               | 4.09  | 35.96 | 4.91 | 0 | 4.13 | 0      | 0     | 0     | 0      | 0 |
| OTU75 | Metazoa Gastrotricha                                                           | 0     | 0     | 0    | 0 | 0    | 0      | 0     | 0     | 0      | 0 |
| OTU76 | Metazoa Arthropoda Crustacea Maxillopoda Copepoda                              | 0     | 0     | 0    | 0 | 0    | 0      | 2.79  | 0     | 0      | 0 |
| OTU78 | Metazoa Mollusca Gastropoda Heterobranchia Calliopaea Calliopaea+bellula       | 0     | 0     | 0    | 0 | 0    | 0      | 0     | 0     | 0      | 0 |
| OTU79 | Metazoa Annelida Phyllodocida Syllidae                                         | 0     | 0     | 0    | 0 | 0    | 0      | 0     | 0     | 0      | 0 |
| OTU80 | Metazoa Echinodermata Echinodermata_X Echinodermata_XX Leptosynapta            | 0     | 0     | 0    | 0 | 0    | 0      | 0     | 0     | 0      | 0 |
| OTU82 | Metazoa Annelida Capitellida Capitellidae Capitella                            | 0     | 0     | 0    | 0 | 0    | 0      | 0     | 0     | 0      | 0 |
| OTU84 | Metazoa Annelida Capitellida Capitellidae Capitella                            | 0     | 0     | 0    | 0 | 0    | 0      | 0     | 0     | 0      | 0 |
| OTU85 | Metazoa Platyhelminthes                                                        | 0     | 0     | 0    | 0 | 0    | 0      | 0     | 0     | 0      | 0 |
| OTU86 | Metazoa Platyhelminthes                                                        | 0     | 0     | 0    | 0 | 0    | 0      | 0     | 0     | 0      | 0 |
| OTU87 | Metazoa Annelida Terebellida Terebellidae                                      | 0     | 0     | 0    | 0 | 0    | 167.71 | 0     | 0     | 0      | 0 |
| OTU88 | Metazoa Platyhelminthes                                                        | 0     | 0     | 0    | 0 | 0    | 0      | 0     | 0     | 0      | 0 |
| OTU89 | Metazoa Annelida Oligochaeta Tubificidae                                       | 0     | 0     | 0    | 0 | 0    | 0      | 0     | 0     | 0      | 0 |
| OTU90 | Metazoa Cnidaria Cnidaria_X Anthozoa Ceriantheopsis                            | 0     | 0     | 0    | 0 | 0    | 0      | 0     | 0     | 0      | 0 |
| OTU91 | Metazoa Annelida Capitellida Scalibregmatidae Scalibregma Scalibregma+inflatum | 0     | 0     | 0    | 0 | 0    | 0      | 0     | 0     | 12.57  | 0 |
| OTU92 | Metazoa Annelida Scolecida Opheliidae Ophelina                                 | 0     | 0     | 0    | 0 | 0    | 0      | 0     | 0     | 0      | 0 |
| OTU93 | Metazoa Gastrotricha                                                           | 0     | 0     | 0    | 0 | 0    | 0      | 0     | 14.41 | 0      | 0 |





|        |                                                     |   |   |   |   |   |      |      |   |   |   |
|--------|-----------------------------------------------------|---|---|---|---|---|------|------|---|---|---|
| OTU162 | Metazoa Annelida Capitellida Capitellidae Capitella | 0 | 0 | 0 | 0 | 0 | 0    | 0    | 0 | 0 | 0 |
| OTU163 | Metazoa Nematoda                                    | 0 | 0 | 0 | 0 | 0 | 0    | 0    | 0 | 0 | 0 |
| OTU164 | Metazoa Nematoda                                    | 0 | 0 | 0 | 0 | 0 | 5.72 | 4.01 | 0 | 0 | 0 |
| OTU165 | Metazoa Nematoda                                    | 0 | 0 | 0 | 0 | 0 | 0    | 0    | 0 | 0 | 0 |
| OTU167 | Metazoa Nematoda                                    | 0 | 0 | 0 | 0 | 0 | 0    | 0    | 0 | 0 | 0 |
| OTU168 | Metazoa Cnidaria Cnidaria_X Hydrozoa                | 0 | 0 | 0 | 0 | 0 | 0    | 0    | 0 | 0 | 0 |
| OTU169 | Metazoa Arthropoda Crustacea Maxillopoda Copepoda   | 0 | 0 | 0 | 0 | 0 | 0    | 0    | 0 | 0 | 0 |
| OTU170 | Metazoa Gastrotricha                                | 0 | 0 | 0 | 0 | 0 | 0    | 0    | 0 | 0 | 0 |
| OTU171 | Metazoa Annelida Phyllodocida Syllidae              | 0 | 0 | 0 | 0 | 0 | 0    | 0    | 0 | 0 | 0 |
| OTU173 | Metazoa Nematoda                                    | 0 | 0 | 0 | 0 | 0 | 0    | 0    | 0 | 0 | 0 |
| OTU174 | Metazoa Arthropoda Crustacea Maxillopoda Copepoda   | 0 | 0 | 0 | 0 | 0 | 0    | 0    | 0 | 0 | 0 |
| OTU175 | Metazoa Arthropoda Crustacea Maxillopoda Copepoda   | 0 | 0 | 0 | 0 | 0 | 0    | 0    | 0 | 0 | 0 |
| OTU176 | Metazoa Platyhelminthes                             | 0 | 0 | 0 | 0 | 0 | 0    | 0    | 0 | 0 | 0 |
| OTU178 | Metazoa Nematoda                                    | 0 | 0 | 0 | 0 | 0 | 0    | 0    | 0 | 0 | 0 |
| OTU180 | Metazoa Nematoda                                    | 0 | 0 | 0 | 0 | 0 | 0    | 0    | 0 | 0 | 0 |
| OTU183 | Metazoa Annelida Oligochaeta Tubificidae            | 0 | 0 | 0 | 0 | 0 | 0    | 0    | 0 | 0 | 0 |
| OTU184 | Metazoa Nematoda                                    | 0 | 0 | 0 | 0 | 0 | 0    | 0    | 0 | 0 | 0 |
| OTU186 | Metazoa Platyhelminthes                             | 0 | 0 | 0 | 0 | 0 | 0    | 0    | 0 | 0 | 0 |
| OTU188 | Metazoa Annelida Terebellida Ampharetidae           | 0 | 0 | 0 | 0 | 0 | 0    | 0    | 0 | 0 | 0 |
| OTU190 | Metazoa Annelida Terebellida Terebellidae           | 0 | 0 | 0 | 0 | 0 | 5.7  | 0    | 0 | 0 | 0 |
| OTU191 | Metazoa Annelida Phyllodocida Syllidae              | 0 | 0 | 0 | 0 | 0 | 0    | 0    | 0 | 0 | 0 |
| OTU192 | Metazoa Annelida Spionida Cirratulidae              | 0 | 0 | 0 | 0 | 0 | 0    | 0    | 0 | 0 | 0 |

### Supplementary Table 7. continued

| OTU  | assign                                                       | DNA_8_1 | DNA_8_2 | DNA_8_3 | DNA_8_4 | DNA_8_5 | DNA_9_1 | DNA_9_2 | DNA_9_3 | DNA_9_4 | DNA_9_5 |
|------|--------------------------------------------------------------|---------|---------|---------|---------|---------|---------|---------|---------|---------|---------|
| OTU1 | Metazoa Annelida Capitellida Capitellidae Capitella          | 0       | 0       | 28.58   | 0       | 1482.61 | 12.79   | 0       | 0       | 0       | 0       |
| OTU2 | Metazoa Annelida Oligochaeta Tubificidae                     | 0       | 0       | 0       | 0       | 0       | 0       | 0       | 0       | 0       | 0       |
| OTU4 | Metazoa Annelida Phyllodocida Phyllodoce Phyllodoce+maculata | 0       | 0       | 0       | 2852.49 | 1087.12 | 0       | 0       | 0       | 0       | 0       |

|       |                                                                         |         |         |         |        |        |        |        |         |         |         |
|-------|-------------------------------------------------------------------------|---------|---------|---------|--------|--------|--------|--------|---------|---------|---------|
| OTU5  | Metazoa Annelida Spionida Spionidae Malacoceros Malacoceros+fuliginosus | 0       | 0       | 0       | 0      | 0      | 0      | 0      | 0       | 0       | 0       |
| OTU6  | Metazoa Annelida Spionida Cirratulidae                                  | 0       | 0       | 0       | 0      | 0      | 0      | 0      | 0       | 0       | 0       |
| OTU7  | Metazoa Platyhelminthes                                                 | 339.48  | 0       | 0       | 24.06  | 655.84 | 0      | 0      | 749.79  | 0       | 911.79  |
| OTU8  | Metazoa Annelida Phyllodocida Syllidae Salvatoria                       | 0       | 0       | 0       | 0      | 0      | 0      | 0      | 621.76  | 0       | 841.78  |
| OTU9  | Metazoa Annelida                                                        | 0       | 2825.47 | 0       | 0      | 0      | 0      | 0      | 0       | 0       | 0       |
| OTU10 | Metazoa Nematoda                                                        | 0       | 0       | 0       | 0      | 0      | 0      | 0      | 0       | 0       | 0       |
| OTU11 | Metazoa Nematoda                                                        | 0       | 0       | 0       | 0      | 0      | 0      | 0      | 0       | 0       | 0       |
| OTU12 | Metazoa Nematoda                                                        | 0       | 0       | 43.52   | 0      | 0      | 13.69  | 0      | 0       | 0       | 138.89  |
| OTU13 | Metazoa Cnidaria Cnidaria_X Anthozoa                                    | 0       | 0       | 0       | 0      | 0      | 0      | 0      | 0       | 0       | 0       |
| OTU14 | Metazoa Nemertea                                                        | 0       | 0       | 0       | 620.2  | 0      | 0      | 0      | 0       | 0       | 0       |
| OTU15 | Metazoa Mollusca Bivalvia Heteroconchia Abra                            | 0       | 0       | 0       | 0      | 0      | 0      | 0      | 864.96  | 0       | 0       |
| OTU16 | Metazoa Platyhelminthes                                                 | 94.14   | 207.19  | 112.97  | 47.56  | 0      | 13.64  | 0      | 0       | 0       | 0       |
| OTU17 | Metazoa Cnidaria Cnidaria_X Hydrozoa                                    | 527.94  | 0       | 1061.25 | 0      | 270.05 | 156.73 | 831.51 | 0       | 0       | 0       |
| OTU18 | Metazoa Platyhelminthes                                                 | 0       | 0       | 0       | 0      | 0      | 881.95 | 0      | 0       | 0       | 0       |
| OTU19 | Metazoa Arthropoda Crustacea Ostracoda                                  | 467.58  | 92.36   | 87.61   | 23.63  | 64.16  | 0      | 2595.9 | 68.16   | 0       | 138.44  |
| OTU20 | Metazoa Nematoda                                                        | 0       | 0       | 0       | 0      | 0      | 0      | 0      | 0       | 0       | 0       |
| OTU21 | Metazoa Annelida Terebellida Ampharetidae                               | 0       | 0       | 0       | 0      | 0      | 0      | 0      | 0       | 0       | 0       |
| OTU22 | Metazoa Annelida Phyllodocida Syllidae Exogone Exogone+naidina          | 0       | 0       | 0       | 0      | 0      | 0      | 0      | 0       | 0       | 0       |
| OTU23 | Metazoa Platyhelminthes                                                 | 406.01  | 0       | 70.97   | 8.81   | 0      | 0      | 208.36 | 329.76  | 80.03   | 0       |
| OTU24 | Metazoa Platyhelminthes                                                 | 0       | 0       | 0       | 0      | 0      | 0      | 0      | 0       | 0       | 0       |
| OTU25 | Metazoa Mollusca Bivalvia Heteroconchia Corbula                         | 0       | 0       | 0       | 0      | 0      | 0      | 0      | 0       | 0       | 0       |
| OTU26 | Metazoa Annelida Capitellida Capitellidae Heteromastus                  | 0       | 0       | 99.36   | 0      | 126.35 | 0      | 0      | 0       | 0       | 0       |
| OTU27 | Metazoa Arthropoda Crustacea Maxillopoda Copepoda                       | 1426.81 | 763.03  | 990.76  | 206.09 | 415.87 | 540.52 | 163.34 | 1269.31 | 731.22  | 1055.14 |
| OTU28 | Metazoa Nematoda                                                        | 0       | 0       | 0       | 0      | 0      | 0      | 0      | 0       | 0       | 0       |
| OTU29 | Metazoa Cnidaria Cnidaria_X Hydrozoa                                    | 0       | 130.5   | 1232.37 | 0      | 0      | 0      | 0      | 0       | 0       | 0       |
| OTU30 | Metazoa Mollusca Gastropoda Heterobranchia Bulla                        | 0       | 0       | 115.51  | 0      | 0      | 0      | 0      | 0       | 0       | 0       |
| OTU31 | Metazoa Platyhelminthes                                                 | 0       | 0       | 56.83   | 69.64  | 0      | 0      | 29.62  | 0       | 0       | 0       |
| OTU32 | Metazoa Arthropoda Crustacea Ostracoda                                  | 0       | 0       | 0       | 0      | 0      | 0      | 0      | 0       | 0       | 0       |
| OTU33 | Metazoa Nemertea                                                        | 0       | 0       | 0       | 0      | 0      | 0      | 0      | 43.37   | 3122.16 | 0       |

|       |                                                                               |        |   |   |        |   |         |       |       |       |   |
|-------|-------------------------------------------------------------------------------|--------|---|---|--------|---|---------|-------|-------|-------|---|
| OTU35 | Metazoa Nemertea                                                              | 0      | 0 | 0 | 59.42  | 0 | 0       | 0     | 0     | 0     | 0 |
| OTU36 | Metazoa Arthropoda Chelicerata                                                | 122.9  | 0 | 0 | 0      | 0 | 0       | 86.09 | 0     | 0     | 0 |
| OTU37 | Metazoa Annelida Phyllodocida Syllidae Erinaceusyllis Erinaceusyllis+cryptica | 0      | 0 | 0 | 0      | 0 | 0       | 0     | 0     | 0     | 0 |
| OTU38 | Metazoa Platyhelminthes                                                       | 0      | 0 | 0 | 0      | 0 | 0       | 0     | 0     | 0     | 0 |
| OTU39 | Metazoa Arthropoda Crustacea Maxillopoda Copepoda                             | 0      | 0 | 0 | 0      | 0 | 0       | 0     | 0     | 0     | 0 |
| OTU40 | Metazoa Annelida Capitellida Maldanidae Praxillella                           | 0      | 0 | 0 | 0      | 0 | 2393.93 | 0     | 0     | 0     | 0 |
| OTU41 | Metazoa Arthropoda Crustacea Maxillopoda Copepoda                             | 0      | 0 | 0 | 0      | 0 | 0       | 0     | 0     | 0     | 0 |
| OTU42 | Metazoa Annelida Phyllodocida Syllidae Exogone Exogone+naidina                | 0      | 0 | 0 | 0      | 0 | 0       | 0     | 0     | 0     | 0 |
| OTU43 | Metazoa Hemichordata                                                          | 0      | 0 | 0 | 0      | 0 | 0       | 0     | 0     | 0     | 0 |
| OTU44 | Metazoa Cnidaria Cnidaria_X Hydrozoa                                          | 0      | 0 | 0 | 0      | 0 | 0       | 86.21 | 0     | 0     | 0 |
| OTU45 | Metazoa Mollusca Bivalvia Protobranchia Nucula                                | 0      | 0 | 0 | 145.47 | 0 | 0       | 0     | 0     | 0     | 0 |
| OTU46 | Metazoa Annelida Capitellida Capitellidae Capitella                           | 0      | 0 | 0 | 0      | 0 | 0       | 0     | 0     | 0     | 0 |
| OTU47 | Metazoa Platyhelminthes                                                       | 0      | 0 | 0 | 0      | 0 | 0       | 0     | 0     | 0     | 0 |
| OTU48 | Metazoa Platyhelminthes                                                       | 0      | 0 | 0 | 4.74   | 0 | 0       | 0     | 0     | 0     | 0 |
| OTU49 | Metazoa Platyhelminthes                                                       | 0      | 0 | 0 | 0      | 0 | 0       | 0     | 0     | 0     | 0 |
| OTU51 | Metazoa Nematoda                                                              | 0      | 0 | 0 | 0      | 0 | 0       | 0     | 0     | 0     | 0 |
| OTU52 | Metazoa Annelida Capitellida Maldanidae                                       | 0      | 0 | 0 | 0      | 0 | 88.75   | 0     | 0     | 0     | 0 |
| OTU53 | Metazoa Nematoda                                                              | 0      | 0 | 0 | 0      | 0 | 0       | 0     | 0     | 0     | 0 |
| OTU54 | Metazoa Annelida Oligochaeta Tubificidae                                      | 0      | 0 | 0 | 0      | 0 | 0       | 0     | 0     | 0     | 0 |
| OTU55 | Metazoa Platyhelminthes                                                       | 0      | 0 | 0 | 0      | 0 | 0       | 0     | 0     | 0     | 0 |
| OTU56 | Metazoa Platyhelminthes                                                       | 0      | 0 | 0 | 0      | 0 | 0       | 0     | 0     | 0     | 0 |
| OTU58 | Metazoa Nematoda                                                              | 126.14 | 0 | 0 | 0      | 0 | 0       | 0     | 0     | 0     | 0 |
| OTU59 | Metazoa Echinodermata Echinodermata_X Echinodermata_XX Amphiura               | 0      | 0 | 0 | 0      | 0 | 0       | 0     | 0     | 0     | 0 |
| OTU60 | Metazoa Platyhelminthes                                                       | 247.56 | 0 | 0 | 0      | 0 | 0       | 0     | 0     | 0     | 0 |
| OTU61 | Metazoa Cnidaria Cnidaria_X Hydrozoa                                          | 249.65 | 0 | 0 | 0      | 0 | 0       | 0     | 0     | 0     | 0 |
| OTU62 | Metazoa Platyhelminthes                                                       | 0      | 0 | 0 | 0      | 0 | 0       | 0     | 0     | 0     | 0 |
| OTU64 | Metazoa Arthropoda Crustacea Maxillopoda Copepoda                             | 0      | 0 | 0 | 0      | 0 | 0       | 0     | 0     | 0     | 0 |
| OTU65 | Metazoa Nematoda                                                              | 0      | 0 | 0 | 0      | 0 | 0       | 0     | 0     | 0     | 0 |
| OTU66 | Metazoa Arthropoda Crustacea Maxillopoda Copepoda                             | 0      | 0 | 0 | 0      | 0 | 0       | 0     | 66.23 | 34.99 | 0 |











## Supplementary Table 7. continued

| OTU   | assign                                                                     | DNA_10_1 | DNA_10_2 | DNA_10_3 | DNA_10_4 | DNA_10_5 |
|-------|----------------------------------------------------------------------------|----------|----------|----------|----------|----------|
| OTU1  | Metazoa Annelida Capitellida Capitellidae Capitella                        | 61.25    | 0        | 0        | 0        | 0        |
| OTU2  | Metazoa Annelida Oligochaeta Tubificidae                                   | 0        | 0        | 0        | 0        | 0        |
| OTU4  | Metazoa Annelida Phyllodocida Phyllodocidae Phyllodoce Phyllodoce+maculata | 0        | 0        | 0        | 0        | 0        |
| OTU5  | Metazoa Annelida Spionida Spionidae Malacoceros Malacoceros+fuliginosus    | 0        | 0        | 0        | 0        | 0        |
| OTU6  | Metazoa Annelida Spionida Cirratulidae                                     | 0        | 0        | 182.01   | 0        | 0        |
| OTU7  | Metazoa Platyhelminthes                                                    | 0        | 546.06   | 0        | 0        | 0        |
| OTU8  | Metazoa Annelida Phyllodocida Syllidae Salvatoria                          | 0        | 0        | 0        | 0        | 0        |
| OTU9  | Metazoa Annelida                                                           | 2524.68  | 0        | 0        | 0        | 0        |
| OTU10 | Metazoa Nematoda                                                           | 0        | 0        | 0        | 0        | 0        |
| OTU11 | Metazoa Nematoda                                                           | 0        | 0        | 0        | 0        | 0        |
| OTU12 | Metazoa Nematoda                                                           | 0        | 0        | 0        | 0        | 0        |
| OTU13 | Metazoa Cnidaria Cnidaria_X Anthozoa                                       | 0        | 0        | 0        | 0        | 0        |
| OTU14 | Metazoa Nemertea                                                           | 0        | 0        | 0        | 0        | 0        |
| OTU15 | Metazoa Mollusca Bivalvia Heteroconchia Abra                               | 0        | 0        | 0        | 0        | 0        |
| OTU16 | Metazoa Platyhelminthes                                                    | 0        | 1263.45  | 3680.48  | 1615.87  | 240.92   |
| OTU17 | Metazoa Cnidaria Cnidaria_X Hydrozoa                                       | 0        | 716.09   | 0        | 2110.86  | 0        |
| OTU18 | Metazoa Platyhelminthes                                                    | 0        | 0        | 0        | 0        | 0        |
| OTU19 | Metazoa Arthropoda Crustacea Ostracoda                                     | 0        | 0        | 0        | 0        | 0        |
| OTU20 | Metazoa Nematoda                                                           | 0        | 0        | 0        | 0        | 0        |
| OTU21 | Metazoa Annelida Terebellida Ampharetidae                                  | 0        | 0        | 0        | 0        | 0        |
| OTU22 | Metazoa Annelida Phyllodocida Syllidae Exogone Exogone+naidina             | 0        | 0        | 0        | 0        | 0        |
| OTU23 | Metazoa Platyhelminthes                                                    | 0        | 0        | 0        | 0        | 0        |
| OTU24 | Metazoa Platyhelminthes                                                    | 0        | 0        | 0        | 0        | 0        |
| OTU25 | Metazoa Mollusca Bivalvia Heteroconchia Corbula                            | 0        | 0        | 0        | 0        | 3751.12  |
| OTU26 | Metazoa Annelida Capitellida Capitellidae Heteromastus                     | 102.59   | 0        | 0        | 0        | 0        |

|       |                                                                                         |        |         |   |   |   |
|-------|-----------------------------------------------------------------------------------------|--------|---------|---|---|---|
| OTU27 | Metazoa   Arthropoda   Crustacea   Maxillopoda   Copepoda                               | 0      | 0       | 0 | 0 | 0 |
| OTU28 | Metazoa   Nematoda                                                                      | 0      | 0       | 0 | 0 | 0 |
| OTU29 | Metazoa   Cnidaria   Cnidaria_X   Hydrozoa                                              | 0      | 0       | 0 | 0 | 0 |
| OTU30 | Metazoa   Mollusca   Gastropoda   Heterobranchia   Bulla                                | 41.42  | 0       | 0 | 0 | 0 |
| OTU31 | Metazoa   Platyhelminthes                                                               | 0      | 0       | 0 | 0 | 0 |
| OTU32 | Metazoa   Arthropoda   Crustacea   Ostracoda                                            | 0      | 0       | 0 | 0 | 0 |
| OTU33 | Metazoa   Nemertea                                                                      | 0      | 0       | 0 | 0 | 0 |
| OTU35 | Metazoa   Nemertea                                                                      | 0      | 1029.42 | 0 | 0 | 0 |
| OTU36 | Metazoa   Arthropoda   Chelicerata                                                      | 0      | 0       | 0 | 0 | 0 |
| OTU37 | Metazoa   Annelida   Phyllodocida   Syllidae   Erinaceusyllis   Erinaceusyllis+cryptica | 0      | 0       | 0 | 0 | 0 |
| OTU38 | Metazoa   Platyhelminthes                                                               | 0      | 0       | 0 | 0 | 0 |
| OTU39 | Metazoa   Arthropoda   Crustacea   Maxillopoda   Copepoda                               | 0      | 0       | 0 | 0 | 0 |
| OTU40 | Metazoa   Annelida   Capitellida   Maldanidae   Praxillella                             | 0      | 0       | 0 | 0 | 0 |
| OTU41 | Metazoa   Arthropoda   Crustacea   Maxillopoda   Copepoda                               | 0      | 0       | 0 | 0 | 0 |
| OTU42 | Metazoa   Annelida   Phyllodocida   Syllidae   Exogone   Exogone+naidina                | 0      | 0       | 0 | 0 | 0 |
| OTU43 | Metazoa   Hemichordata                                                                  | 0      | 0       | 0 | 0 | 0 |
| OTU44 | Metazoa   Cnidaria   Cnidaria_X   Hydrozoa                                              | 672.97 | 0       | 0 | 0 | 0 |
| OTU45 | Metazoa   Mollusca   Bivalvia   Protobranchia   Nucula                                  | 0      | 0       | 0 | 0 | 0 |
| OTU46 | Metazoa   Annelida   Capitellida   Capitellidae   Capitella                             | 0      | 0       | 0 | 0 | 0 |
| OTU47 | Metazoa   Platyhelminthes                                                               | 0      | 0       | 0 | 0 | 0 |
| OTU48 | Metazoa   Platyhelminthes                                                               | 0      | 0       | 0 | 0 | 0 |
| OTU49 | Metazoa   Platyhelminthes                                                               | 699.09 | 0       | 0 | 0 | 0 |
| OTU51 | Metazoa   Nematoda                                                                      | 0      | 0       | 0 | 0 | 0 |
| OTU52 | Metazoa   Annelida   Capitellida   Maldanidae                                           | 0      | 418.97  | 0 | 0 | 0 |
| OTU53 | Metazoa   Nematoda                                                                      | 0      | 0       | 0 | 0 | 0 |
| OTU54 | Metazoa   Annelida   Oligochaeta   Tubificidae                                          | 0      | 0       | 0 | 0 | 0 |
| OTU55 | Metazoa   Platyhelminthes                                                               | 0      | 0       | 0 | 0 | 0 |
| OTU56 | Metazoa   Platyhelminthes                                                               | 0      | 0       | 0 | 0 | 0 |
| OTU58 | Metazoa   Nematoda                                                                      | 0      | 0       | 0 | 0 | 0 |

|       |                                                                                |   |       |        |        |       |
|-------|--------------------------------------------------------------------------------|---|-------|--------|--------|-------|
| OTU59 | Metazoa Echinodermata Echinodermata_X Echinodermata_XX Amphiura                | 0 | 0     | 0      | 0      | 0     |
| OTU60 | Metazoa Platyhelminthes                                                        | 0 | 0     | 0      | 0      | 0     |
| OTU61 | Metazoa Cnidaria Cnidaria_X Hydrozoa                                           | 0 | 0     | 0      | 0      | 95.01 |
| OTU62 | Metazoa Platyhelminthes                                                        | 0 | 0     | 0      | 0      | 0     |
| OTU64 | Metazoa Arthropoda Crustacea Maxillopoda Copepoda                              | 0 | 0     | 0      | 0      | 0     |
| OTU65 | Metazoa Nematoda                                                               | 0 | 0     | 0      | 0      | 0     |
| OTU66 | Metazoa Arthropoda Crustacea Maxillopoda Copepoda                              | 0 | 0     | 0      | 0      | 0     |
| OTU68 | Metazoa Platyhelminthes                                                        | 0 | 53.54 | 0      | 0      | 0     |
| OTU69 | Metazoa Platyhelminthes                                                        | 0 | 0     | 0      | 0      | 0     |
| OTU70 | Metazoa Arthropoda Crustacea Maxillopoda Copepoda                              | 0 | 0     | 0      | 0      | 0     |
| OTU71 | Metazoa Platyhelminthes                                                        | 0 | 0     | 0      | 0      | 0     |
| OTU72 | Metazoa Nematoda                                                               | 0 | 0     | 0      | 0      | 0     |
| OTU73 | Metazoa Nematoda                                                               | 0 | 21.3  | 0      | 0      | 0     |
| OTU75 | Metazoa Gastrotricha                                                           | 0 | 0     | 120.06 | 375.27 | 0     |
| OTU76 | Metazoa Arthropoda Crustacea Maxillopoda Copepoda                              | 0 | 0     | 0      | 0      | 0     |
| OTU78 | Metazoa Mollusca Gastropoda Heterobranchia Calliopaea Calliopaea+bellula       | 0 | 0     | 0      | 0      | 0     |
| OTU79 | Metazoa Annelida Phyllodocida Syllidae                                         | 0 | 0     | 0      | 0      | 0     |
| OTU80 | Metazoa Echinodermata Echinodermata_X Echinodermata_XX Leptosynapta            | 0 | 0     | 0      | 0      | 0     |
| OTU82 | Metazoa Annelida Capitellida Capitellidae Capitella                            | 0 | 0     | 0      | 0      | 0     |
| OTU84 | Metazoa Annelida Capitellida Capitellidae Capitella                            | 0 | 0     | 0      | 0      | 0     |
| OTU85 | Metazoa Platyhelminthes                                                        | 0 | 0     | 0      | 0      | 0     |
| OTU86 | Metazoa Platyhelminthes                                                        | 0 | 0     | 0      | 0      | 0     |
| OTU87 | Metazoa Annelida Terebellida Terebellidae                                      | 0 | 0     | 0      | 0      | 0     |
| OTU88 | Metazoa Platyhelminthes                                                        | 0 | 0     | 0      | 0      | 0     |
| OTU89 | Metazoa Annelida Oligochaeta Tubificidae                                       | 0 | 0     | 0      | 0      | 0     |
| OTU90 | Metazoa Cnidaria Cnidaria_X Anthozoa Ceriantheopsis                            | 0 | 0     | 0      | 0      | 0     |
| OTU91 | Metazoa Annelida Capitellida Scalibregmatidae Scalibregma Scalibregma+inflatum | 0 | 53.17 | 0      | 0      | 0     |
| OTU92 | Metazoa Annelida Scolecida Opheliidae Ophelina                                 | 0 | 0     | 0      | 0      | 0     |
| OTU93 | Metazoa Gastrotricha                                                           | 0 | 0     | 0      | 0      | 0     |

|        |                                                                                   |   |   |   |   |       |
|--------|-----------------------------------------------------------------------------------|---|---|---|---|-------|
| OTU94  | Metazoa   Platyhelminthes                                                         | 0 | 0 | 0 | 0 | 0     |
| OTU95  | Metazoa   Arthropoda   Crustacea   Ostracoda                                      | 0 | 0 | 0 | 0 | 0     |
| OTU96  | Metazoa   Platyhelminthes                                                         | 0 | 0 | 0 | 0 | 0     |
| OTU97  | Metazoa   Platyhelminthes                                                         | 0 | 0 | 0 | 0 | 0     |
| OTU98  | Metazoa   Platyhelminthes                                                         | 0 | 0 | 0 | 0 | 0     |
| OTU99  | Metazoa   Platyhelminthes                                                         | 0 | 0 | 0 | 0 | 0     |
| OTU100 | Metazoa   Arthropoda   Crustacea   Ostracoda                                      | 0 | 0 | 0 | 0 | 0     |
| OTU101 | Metazoa   Annelida   Phyllodocida   Phyllodocidae                                 | 0 | 0 | 0 | 0 | 0     |
| OTU102 | Metazoa   Arthropoda   Crustacea   Maxillopoda   Copepoda                         | 0 | 0 | 0 | 0 | 0     |
| OTU103 | Metazoa   Nemertea                                                                | 0 | 0 | 0 | 0 | 0     |
| OTU104 | Metazoa   Annelida   Phyllodocida   Syllidae                                      | 0 | 0 | 0 | 0 | 0     |
| OTU107 | Metazoa   Arthropoda   Crustacea   Ostracoda                                      | 0 | 0 | 0 | 0 | 0     |
| OTU108 | Metazoa   Annelida   Spionida   Spionidae   Malacoceros   Malacoceros+fuliginosus | 0 | 0 | 0 | 0 | 0     |
| OTU109 | Metazoa   Arthropoda   Crustacea   Maxillopoda   Copepoda                         | 0 | 0 | 0 | 0 | 0     |
| OTU110 | Metazoa   Arthropoda   Crustacea   Maxillopoda   Copepoda                         | 0 | 0 | 0 | 0 | 0     |
| OTU111 | Metazoa   Kinorhyncha                                                             | 0 | 0 | 0 | 0 | 0     |
| OTU112 | Metazoa   Platyhelminthes                                                         | 0 | 0 | 0 | 0 | 0     |
| OTU113 | Metazoa   Nematoda                                                                | 0 | 0 | 0 | 0 | 0     |
| OTU114 | Metazoa   Nematoda                                                                | 0 | 0 | 0 | 0 | 0     |
| OTU115 | Metazoa                                                                           | 0 | 0 | 0 | 0 | 14.95 |
| OTU116 | Metazoa   Platyhelminthes                                                         | 0 | 0 | 0 | 0 | 0     |
| OTU117 | Metazoa   Nematoda                                                                | 0 | 0 | 0 | 0 | 0     |
| OTU118 | Metazoa   Arthropoda   Crustacea   Maxillopoda   Copepoda                         | 0 | 0 | 0 | 0 | 0     |
| OTU119 | Metazoa   Nematoda                                                                | 0 | 0 | 0 | 0 | 0     |
| OTU120 | Metazoa   Platyhelminthes                                                         | 0 | 0 | 0 | 0 | 0     |
| OTU121 | Metazoa   Nematoda                                                                | 0 | 0 | 0 | 0 | 0     |
| OTU122 | Metazoa   Annelida   Oligochaeta   Tubificidae                                    | 0 | 0 | 0 | 0 | 0     |
| OTU123 | Metazoa   Mollusca   Bivalvia   Heteroconchia   Myrtea   Myrtea+spinifera         | 0 | 0 | 0 | 0 | 0     |
| OTU124 | Metazoa   Annelida   Terebellida   Pectinariidae   Pectinaria                     | 0 | 0 | 0 | 0 | 0     |



|        |                                                                                   |   |   |   |   |   |
|--------|-----------------------------------------------------------------------------------|---|---|---|---|---|
| OTU125 | Metazoa   Platyhelminthes                                                         | 0 | 0 | 0 | 0 | 0 |
| OTU126 | Metazoa   Nematoda                                                                | 0 | 0 | 0 | 0 | 0 |
| OTU128 | Metazoa   Kinorhyncha                                                             | 0 | 0 | 0 | 0 | 0 |
| OTU130 | Metazoa   Annelida   Phyllodocida   Phyllodocidae                                 | 0 | 0 | 0 | 0 | 0 |
| OTU131 | Metazoa   Annelida   Oligochaeta   Tubificidae                                    | 0 | 0 | 0 | 0 | 0 |
| OTU132 | Metazoa   Nematoda                                                                | 0 | 0 | 0 | 0 | 0 |
| OTU134 | Metazoa   Annelida   Phyllodocida   Syllidae                                      | 0 | 0 | 0 | 0 | 0 |
| OTU135 | Metazoa   Annelida   Capitellida   Capitellidae   Capitella                       | 0 | 0 | 0 | 0 | 0 |
| OTU136 | Metazoa   Nematoda                                                                | 0 | 0 | 0 | 0 | 0 |
| OTU137 | Metazoa   Hemichordata                                                            | 0 | 0 | 0 | 0 | 0 |
| OTU138 | Metazoa                                                                           | 0 | 0 | 0 | 0 | 0 |
| OTU141 | Metazoa   Nematoda                                                                | 0 | 0 | 0 | 0 | 0 |
| OTU143 | Metazoa   Annelida   Capitellida   Capitellidae   Capitella                       | 0 | 0 | 0 | 0 | 0 |
| OTU144 | Metazoa   Platyhelminthes                                                         | 0 | 0 | 0 | 0 | 0 |
| OTU145 | Metazoa   Annelida   Spionida   Spionidae   Malacoceros   Malacoceros+fuliginosus | 0 | 0 | 0 | 0 | 0 |
| OTU146 | Metazoa   Arthropoda   Crustacea   Maxillopoda   Copepoda                         | 0 | 0 | 0 | 0 | 0 |
| OTU147 | Metazoa   Porifera                                                                | 0 | 0 | 0 | 0 | 0 |
| OTU149 | Metazoa   Mollusca   Bivalvia   Heteroconchia   Macoma   Macoma+nasuta            | 0 | 0 | 0 | 0 | 0 |
| OTU151 | Metazoa   Nematoda                                                                | 0 | 0 | 0 | 0 | 0 |
| OTU152 | Metazoa   Platyhelminthes                                                         | 0 | 0 | 0 | 0 | 0 |
| OTU153 | Metazoa   Annelida   Phyllodocida   Phyllodocidae                                 | 0 | 0 | 0 | 0 | 0 |
| OTU154 | Metazoa   Annelida   Spionida   Cirratulidae                                      | 0 | 0 | 0 | 0 | 0 |
| OTU155 | Metazoa   Annelida   Spionida   Cirratulidae                                      | 0 | 0 | 0 | 0 | 0 |
| OTU156 | Metazoa   Arthropoda   Crustacea   Maxillopoda   Copepoda                         | 0 | 0 | 0 | 0 | 0 |
| OTU157 | Metazoa   Annelida   Phyllodocida   Phyllodocidae                                 | 0 | 0 | 0 | 0 | 0 |
| OTU158 | Metazoa   Annelida   Phyllodocida   Phyllodocidae                                 | 0 | 0 | 0 | 0 | 0 |
| OTU159 | Metazoa   Rotifera                                                                | 0 | 0 | 0 | 0 | 0 |
| OTU160 | Metazoa   Arthropoda   Crustacea   Maxillopoda   Copepoda                         | 0 | 0 | 0 | 0 | 0 |
| OTU161 | Metazoa   Platyhelminthes                                                         | 0 | 0 | 0 | 0 | 0 |

|        |                                                             |   |   |        |   |   |
|--------|-------------------------------------------------------------|---|---|--------|---|---|
| OTU162 | Metazoa   Annelida   Capitellida   Capitellidae   Capitella | 0 | 0 | 0      | 0 | 0 |
| OTU163 | Metazoa   Nematoda                                          | 0 | 0 | 0      | 0 | 0 |
| OTU164 | Metazoa   Nematoda                                          | 0 | 0 | 0      | 0 | 0 |
| OTU165 | Metazoa   Nematoda                                          | 0 | 0 | 0      | 0 | 0 |
| OTU167 | Metazoa   Nematoda                                          | 0 | 0 | 0      | 0 | 0 |
| OTU168 | Metazoa   Cnidaria   Cnidaria_X   Hydrozoa                  | 0 | 0 | 0      | 0 | 0 |
| OTU169 | Metazoa   Arthropoda   Crustacea   Maxillopoda   Copepoda   | 0 | 0 | 0      | 0 | 0 |
| OTU170 | Metazoa   Gastrotricha                                      | 0 | 0 | 0      | 0 | 0 |
| OTU171 | Metazoa   Annelida   Phyllodocida   Syllidae                | 0 | 0 | 0      | 0 | 0 |
| OTU173 | Metazoa   Nematoda                                          | 0 | 0 | 0      | 0 | 0 |
| OTU174 | Metazoa   Arthropoda   Crustacea   Maxillopoda   Copepoda   | 0 | 0 | 0      | 0 | 0 |
| OTU175 | Metazoa   Arthropoda   Crustacea   Maxillopoda   Copepoda   | 0 | 0 | 0      | 0 | 0 |
| OTU176 | Metazoa   Platyhelminthes                                   | 0 | 0 | 0      | 0 | 0 |
| OTU178 | Metazoa   Nematoda                                          | 0 | 0 | 0      | 0 | 0 |
| OTU180 | Metazoa   Nematoda                                          | 0 | 0 | 0      | 0 | 0 |
| OTU183 | Metazoa   Annelida   Oligochaeta   Tubificidae              | 0 | 0 | 0      | 0 | 0 |
| OTU184 | Metazoa   Nematoda                                          | 0 | 0 | 119.45 | 0 | 0 |
| OTU186 | Metazoa   Platyhelminthes                                   | 0 | 0 | 0      | 0 | 0 |
| OTU188 | Metazoa   Annelida   Terebellida   Ampharetidae             | 0 | 0 | 0      | 0 | 0 |
| OTU190 | Metazoa   Annelida   Terebellida   Terebellidae             | 0 | 0 | 0      | 0 | 0 |
| OTU191 | Metazoa   Annelida   Phyllodocida   Syllidae                | 0 | 0 | 0      | 0 | 0 |
| OTU192 | Metazoa   Annelida   Spionida   Cirratulidae                | 0 | 0 | 0      | 0 | 0 |
